# Supplementary material
Source: PubMed Central journal article supplement (PMC8215920)
Supplement: btz721_supplementary_data.pdf [file btz721_supplementary_data.pdf]

## Supplementary Materials

### Supplementary Methods: other inputs compared in Section 3.5

#### CKSAAP

The CKSAAP feature calculates the frequency of amino acid pairs separated by any  $k$  residues ( $k=0, 1, 2, \dots, 5$ ). Taking  $k=0$  as an example, there are 400 0-spaced residue pairs (AA, AC, AD, ..., YY). The feature vector can then be defined as:

$$\left( \frac{N_{AA}}{N_{total}}, \frac{N_{AC}}{N_{total}}, \frac{N_{AD}}{N_{total}}, \dots, \frac{N_{YY}}{N_{total}} \right)_{400}$$

where  $N_{AA}$  represents the number of times of residue pair AA appears in the protein sequence, and so on.  $N_{total}$  is the total number of  $k$ -spaced residue pairs in the protein. For  $k=0, 1, 2, 3, 4$  and  $5$ ,  $N_{total} = \text{length}(P) - 1, \text{length}(P) - 2, \text{length}(P) - 3, \text{length}(P) - 4, \text{length}(P) - 5, \text{length}(P) - 6$ .  $\text{length}(P)$  represents the length of protein  $P$ . In this study, the CKSAAP encoding was performed using  $k = 0, 1, 2, 3, 4$  and  $5$ . Accordingly, CKSAAP feature was encoded as a  $6 \times 400$  matrix. For consistency with the other features, we reshaped this matrix into an  $80 \times 30$  matrix as follows:

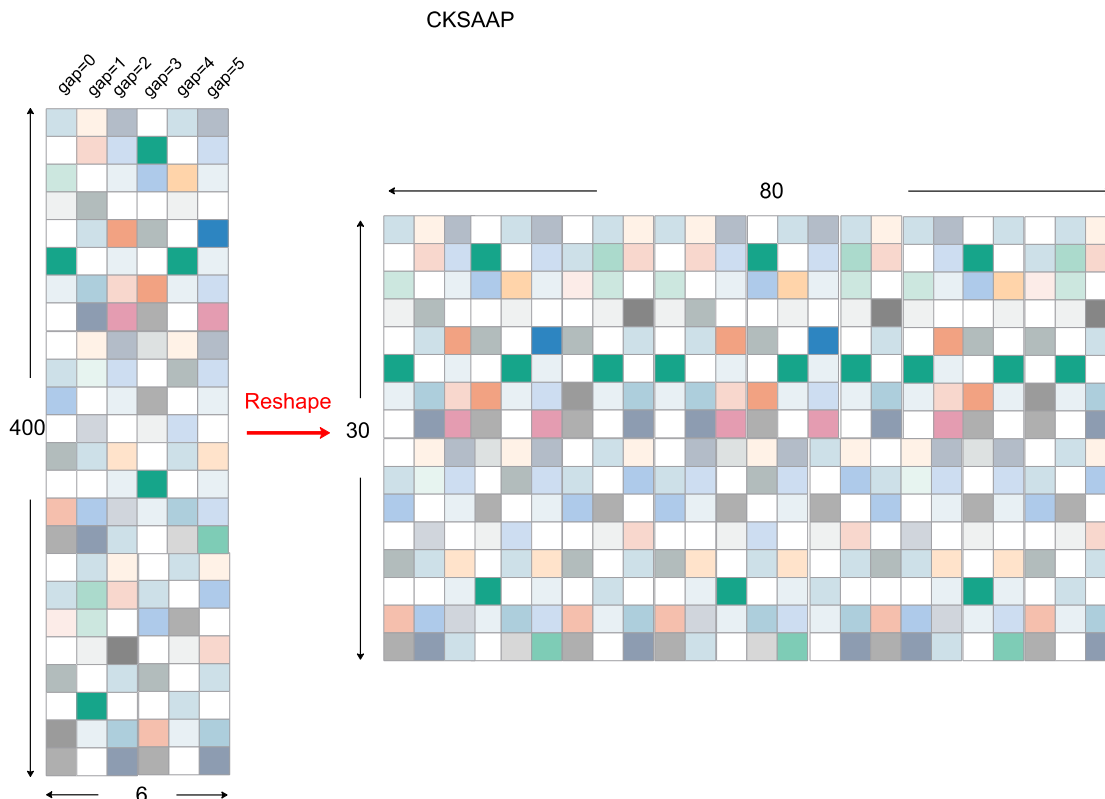

#### BLOSUM62

A BLOSUM62 matrix comprising of  $m \times n$  features is used to represent each protein in a training dataset, where  $n$  denotes the protein length and  $m=20$ . Thus, in this study, the BLOSUM62 was encoded as a  $20 \times 30$  matrix as follows.

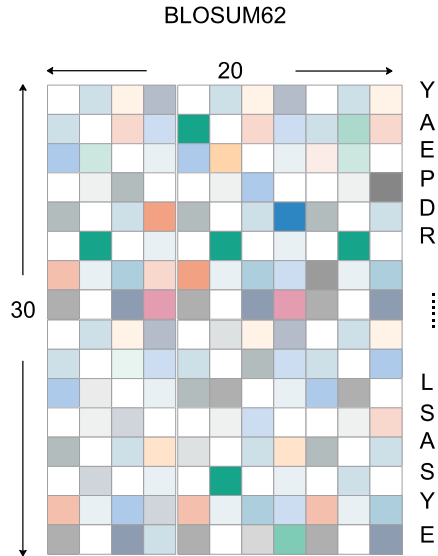

### PSSM and conservation scores

PSSM features were extracted from the Position-Specific Scoring Matrix (PSSM) profile. We obtained the PSSM profile by running PSI-BLAST against the UniRef90 database. Each amino acid is represented by a 20-dimensional vector. We also computed conservation scores from the PSSM generated by PSI-BLAST as:

$$Score_i = - \sum_{j=1}^{20} p_{i,j} \log_2 p_{i,j}$$

where  $p_{i,j}$  is the frequency of amino acid  $j$  at position  $i$ . In this study, we encoded the PSSM values and the conservation scores into a  $21 \times 30$  matrix as follow:

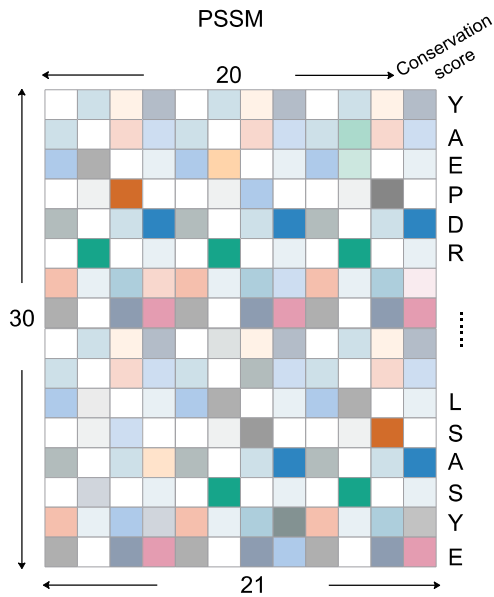

### Predicted secondary structure

We employed the PSIPRED to predict the secondary structure. In this study, the predicted secondary structure was encoded into a 4×30 matrix as follow:

Secondary structure

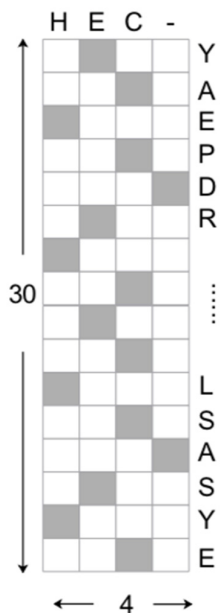

### Predicted solvent accessibility

We employed the ASAquick to predict solvent accessibility including raw solvent accessibility (ASA) and relative accessibility (RASA). In this study, the predicted solvent accessibility values were encoded into a 2×30 matrix as follow:

ASAquick

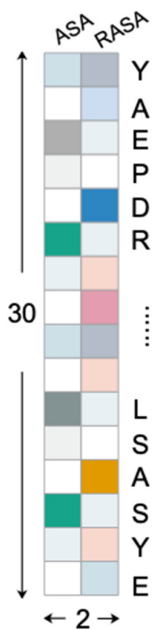

## All features

We also combined all features together, including CKSAAP, BLOSUM62, one-hot, secondary structure, PSSM, conservation score, and solvent accessibility, to compare the model performance. The combined input was encoded into a  $148 \times 30$  matrix as follow:

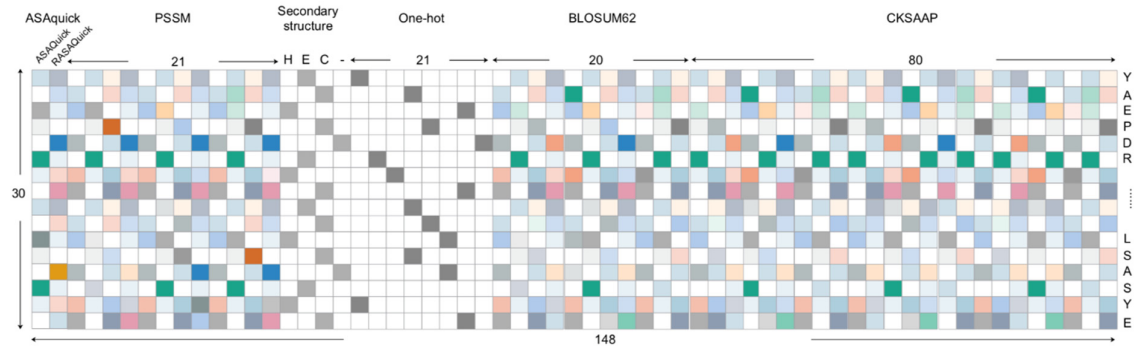

# Supplementary Results

## Contents

### Figures:

- Figure S1.** The detailed architecture of DeepCleave. Panel A shows the topology of the deep CNN. Panel B visualizes three different kernel sizes used in the first and the second convolutional layers. We use the first two convolutional layers as an example – note that the architecture of the third layer is similar to the first two layers. .... 7
- Figure S2.** Comparison of the predictive performance for the four models considered in the ablation study on the test dataset using five-fold cross-validation. The results concern six different proteases: caspase-7, caspase-2, MMP-8, MMP-3, MMP-12 and membrane-type MMP-1; the identifier inside the brackets (e.g. "C14.005") is the protease ID in MEROPS. The following models are included: DeepCleave, DeepCleave with-out attention layer, DeepCleave with only one kernel size in the second and the third convolutional layer, and DeepCleave with two kernel sizes in the second and the third convolutional layer. .... 8
- Figure S3.** t-SNE plots of the input one-hot encoding (panels A and B), feature representation after the attention layer (panels C and D), and the feature representation of the 2nd fully connected layer (panels E and F) for the models for the caspases (on the left) and the MMPs (on the right). .... 9
- Figure S4.** ROC curves and corresponding AUC values generated by seven considered protease cleavage site predictors (DeepCleave, Cascleave, SitePrediction, CleavPredict, CAT3, ScreenCap3, and PROSPERous) for caspase-7, caspase-2, MMP-8, MMP-3, MMP-12, and membrane-type MMP-1; the identifier in the brackets (e.g. "C14.005") is the protease ID in MEROPS. .... 10
- Figure S5.** Illustration of the predictions generated with DeepCleave webserver for two case study proteins collected from the test dataset: Claspin (top two panels) and Heat shock 70 kDa protein 4 (bottom two panels). The panels of the left summarize predictions generated by DeepCleave while the panels on the right show experimental annotations of the cleavage sites. .... 11
- Figure S6.** Visualization of the enriched Gene Ontology terms for the putative substrates of caspases and MMPs in human. .... 12

### Tables:

- Table S1.** Size and composition of the data used to develop the training and test datasets for the caspase and MMP families. We used the CD-HIT program to cluster the sequences to reduce the sequence similarity between the training and test sets to 20%. .... 13
- Table S2.** The number of substrates and cleavage sites for the training dataset. .... 15
- Table S3.** The number of sequences and cleavage sites in the test dataset. .... 17
- Table S4.** Predictive performance for the prediction of the substrate cleavage sites for 5 proteases from caspase family for the DeepCleave trained without the transfer learning (original) and DeepCleave trained with transfer learning (transfer): C14.001 (caspase-1), C14.003 (caspase-3), C14.004 (caspase-7), C14.005 (caspase-6) and C14.006 (caspase-2). The results were evaluated in terms of MCC, ACC (Accuracy), Sensitivity (Sn), Specificity (Sp), Precision, and AUC on the test dataset. .... 18
- Table S5.** Predictive performance for the prediction of the substrate cleavage sites for 7 proteases from MMP family for the DeepCleave trained without the transfer learning (original) and DeepCleave trained with transfer learning (transfer): M10.002(matrix metalloproteinase-8), M10.003 (matrix metalloproteinase-2), M10.004 (matrix metalloproteinase-9), M10.005 (matrix metalloproteinase-3), M10.008 (matrix metalloproteinase-7), M10.009 (matrix metalloproteinase-12) and M10.014 (membrane-type matrix metalloproteinase-1). The results were evaluated in terms of MCC, ACC (Accuracy), Sensitivity (Sn), Specificity (Sp), Precision, and AUC on the test dataset. .... 22
- Table S6.** Comparison of the predictive performance for Cascleave, CAT3, CleavPredict, ScreenCap3, SitePrediction, PROSPERous, DeepCleave (original; before transfer learning) and DeepCleave (transfer; after transfer learning) for the prediction of the substrate cleavage sites of 12 proteases from the caspase and MMP families: C14.001 (caspase-1), C14.003 (caspase-3), C14.004 (caspase-7), C14.005 (caspase-6), C14.006 (caspase-2), M10.002 (matrix metalloproteinase-8), M10.003 (matrix metalloproteinase-2), M10.004 (matrix metalloproteinase-9), M10.005 (matrix metalloproteinase-3),

M10.008 (matrix metallopeptidase-7), M10.009 (matrix metallopeptidase-12) and M10.014 (membrane-type matrix metallopeptidase-1). The results were evaluated in terms of MCC, ACC (Accuracy), Sensitivity (Sn), Specificity (Sp), Precision and AUC on the test dataset. NA (not applicable) means that a given tool does not make this prediction. Methods with the best results (AUC) for a given protease are shown in bold font. .... 28

**Table S7.** Comparison of the predictive performance of models trained using the CKSAAP, putative secondary structure (SS), PSSM with conservation scores (PSSM+CS), putative solvent accessibility (SAS), one-hot encoding, and all inputs combined (all features) for the substrate cleavage site prediction of 12 proteases. The results were evaluated in terms of MCC, ACC (Accuracy), Sensitivity (Sn), Specificity (Sp), Precision and AUC on the training dataset. The best results for a given protease are marked in bold. .... 31

**Table S8.** Comparison of the predictive performance of models trained using the CKSAAP, BLOSUM62, putative secondary structure (SS), PSSM with conservation scores (PSSM+CS), putative solvent accessibility (SAS), one-hot encoding, and all inputs combined (all features) for the substrate cleavage site prediction of 12 proteases. The results were evaluated in terms of MCC, ACC (Accuracy), Sensitivity (Sn), Specificity (Sp), Precision and AUC on the independent test dataset. The best results for a given protease are shown in bold font. .... 35

**Table S9.** Summary of the results of the proteome-wide substrate cleavage site predictions for the 20425 human sequences and 12 proteases from caspase and MMP families generated by DeepCleave. These predictions utilize high-confidence specificity level ( $\geq 0.99$ ) for each protease to generate high-confidence results. .... 37

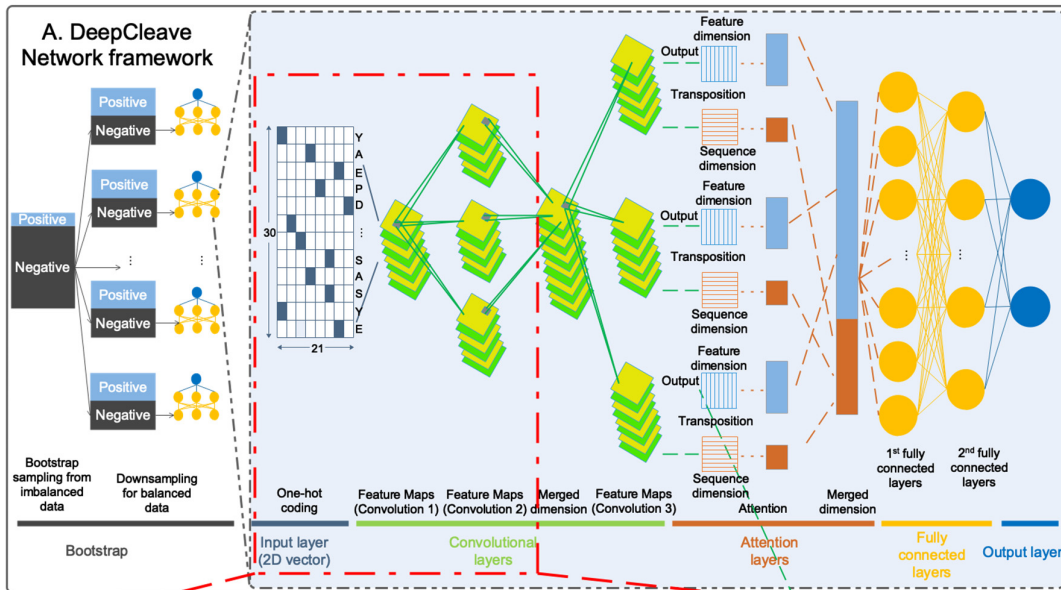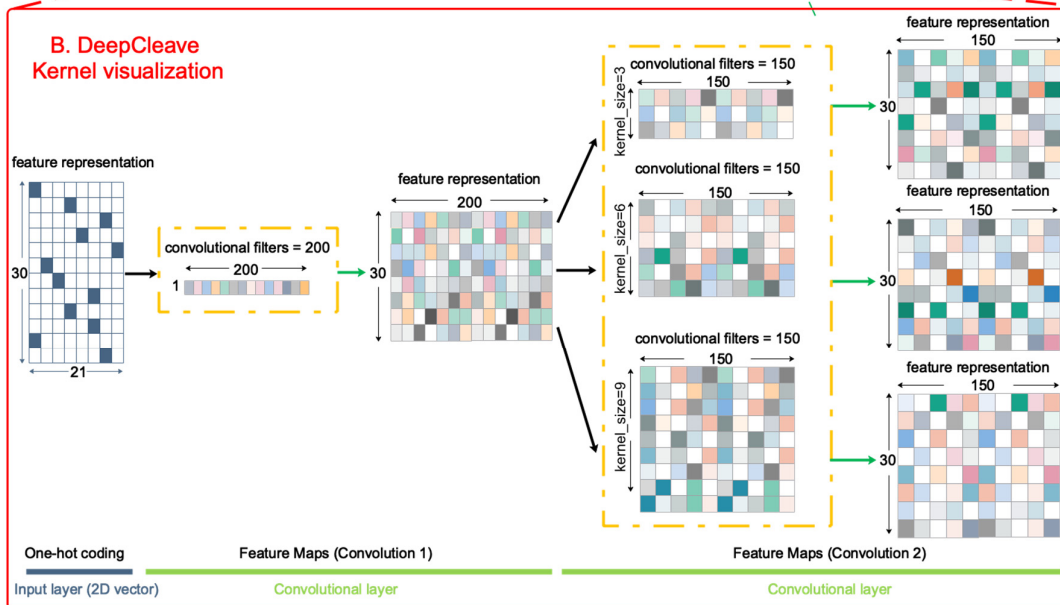

**Figure S1.** The detailed architecture of DeepCleave. Panel A shows the topology of the deep CNN. Panel B visualizes three different kernel sizes used in the first and the second convolutional layers. We use the first two convolutional layers as an example – note that the architecture of the third layer is similar to the first two layers.

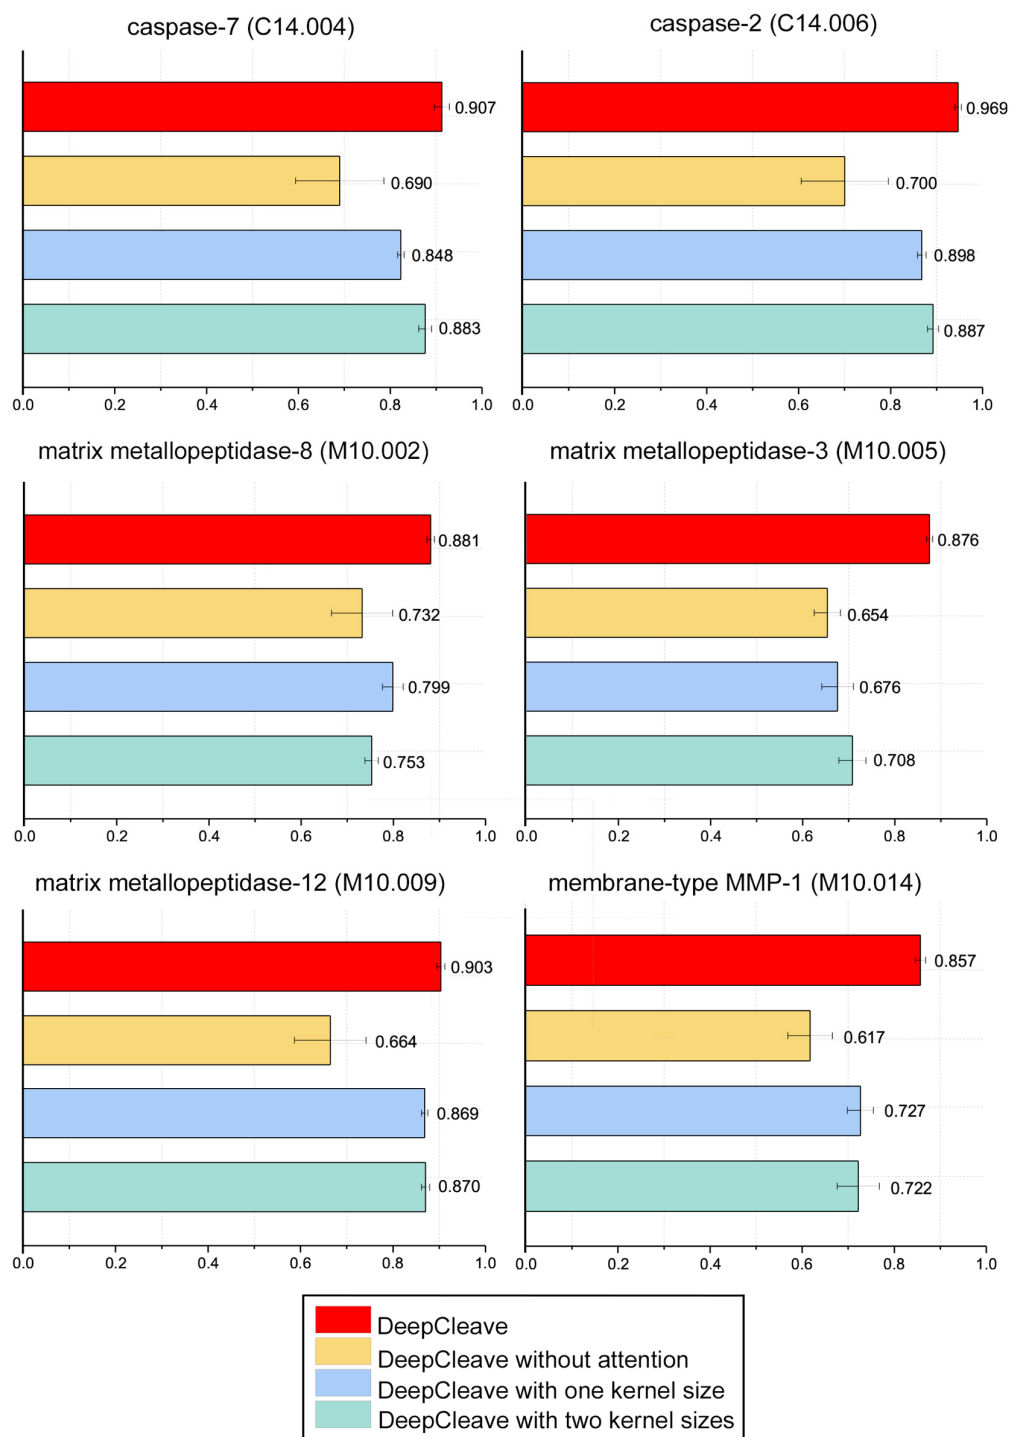

**Figure S2.** Comparison of the predictive performance for the four models considered in the ablation study on the test dataset using five-fold cross-validation. The results concern six different proteases: caspase-7, caspase-2, MMP-8, MMP-3, MMP-12 and membrane-type MMP-1; the identifier inside the brackets (e.g. "C14.005") is the protease ID in MEROPS. The following models are included: DeepCleave, DeepCleave with-out attention layer, DeepCleave with only one kernel size in the second and the third convolutional layer, and DeepCleave with two kernel sizes in the second and the third convolutional layer.



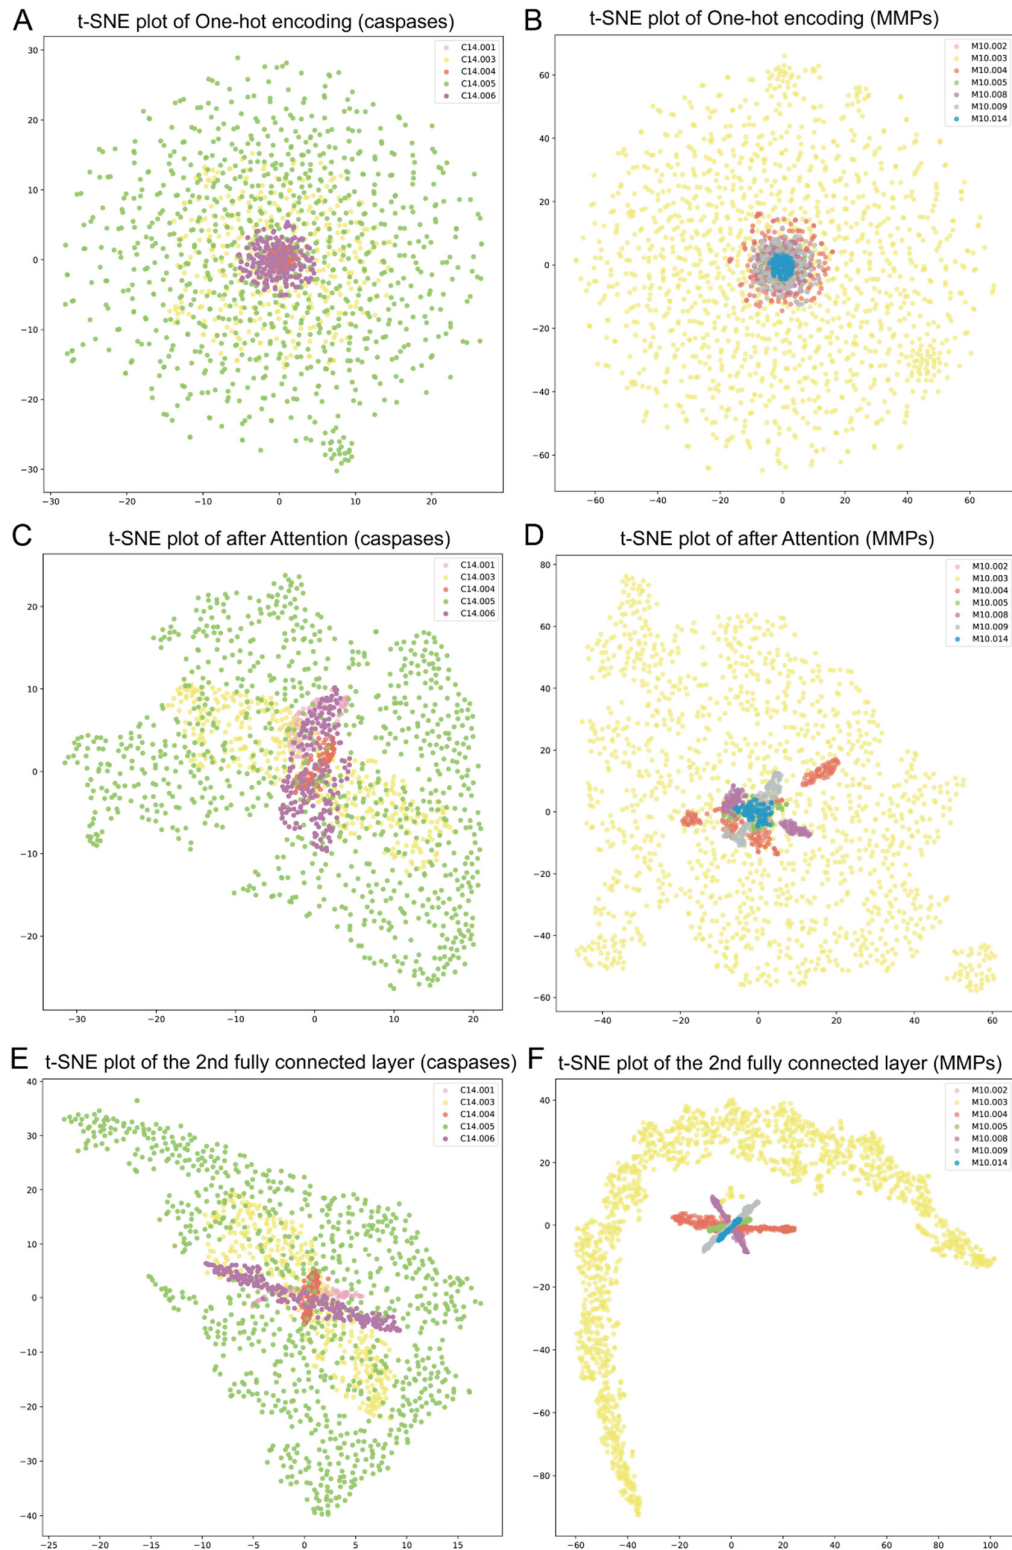

**Figure S3.** t-SNE plots of the input one-hot encoding (panels A and B), feature representation after the attention layer (panels C and D), and the feature representation of the 2nd fully connected layer (panels E and F) for the models for the caspases (on the left) and the MMPs (on the right).

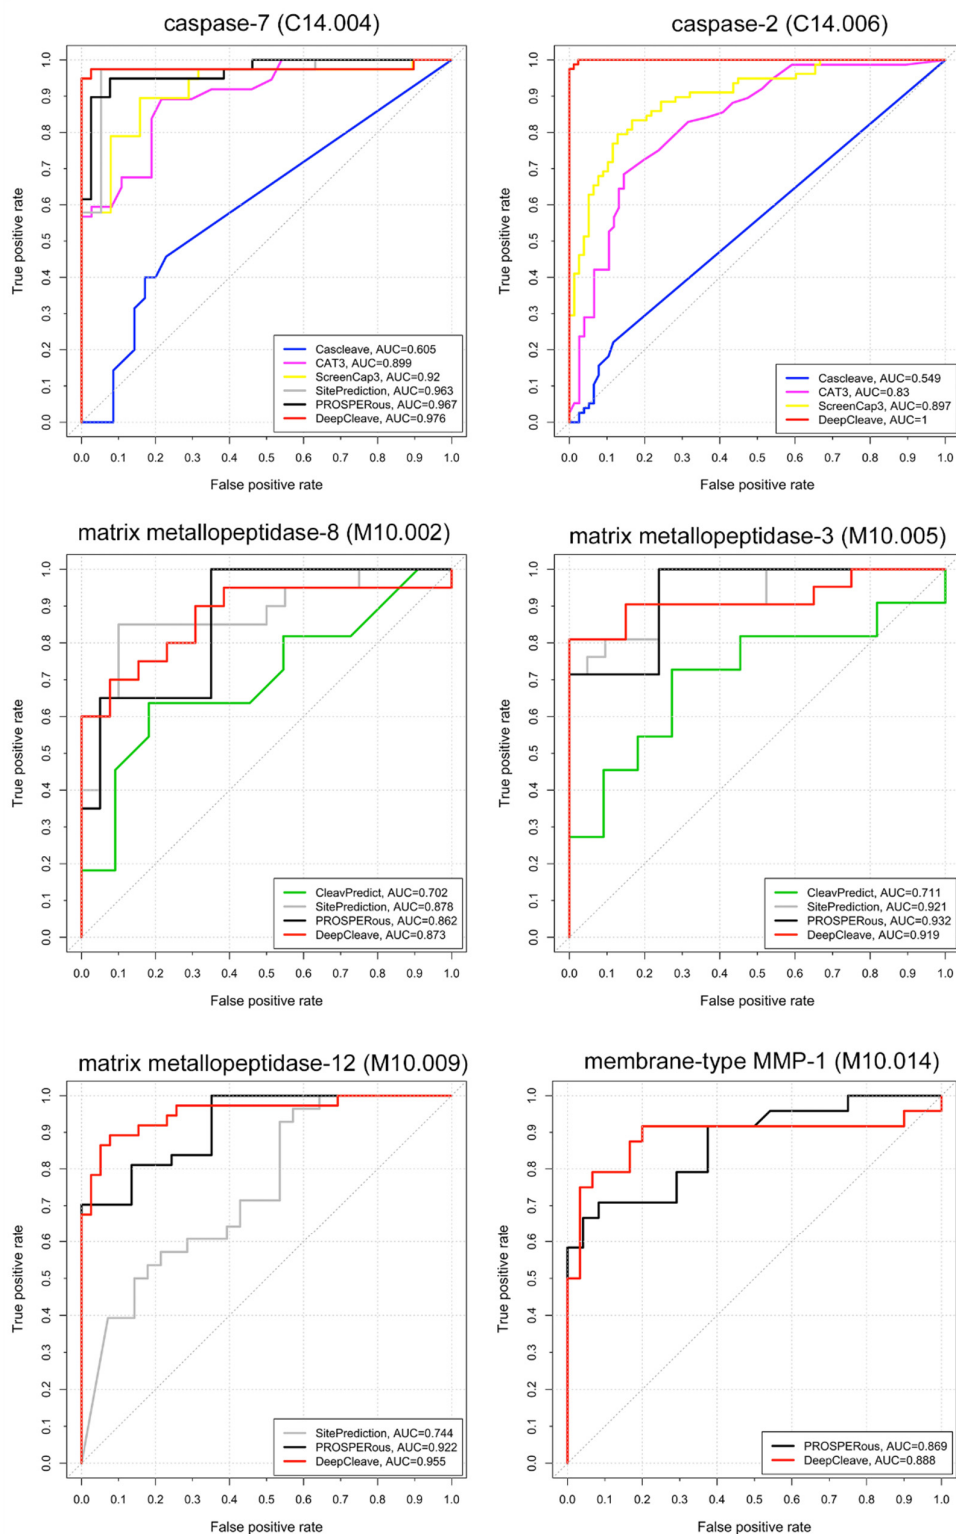

**Figure S4.** ROC curves and corresponding AUC values generated by seven considered protease cleavage site predictors (DeepCleave, CasCleave, SitePrediction, CleavPredict, CAT3, ScreenCap3, and PROSPERous) for caspase-7, caspase-2, MMP-8, MMP-3, MMP-12, and membrane-type MMP-1; the identifier in the brackets (e.g. "C14.005") is the protease ID in MEROPS.

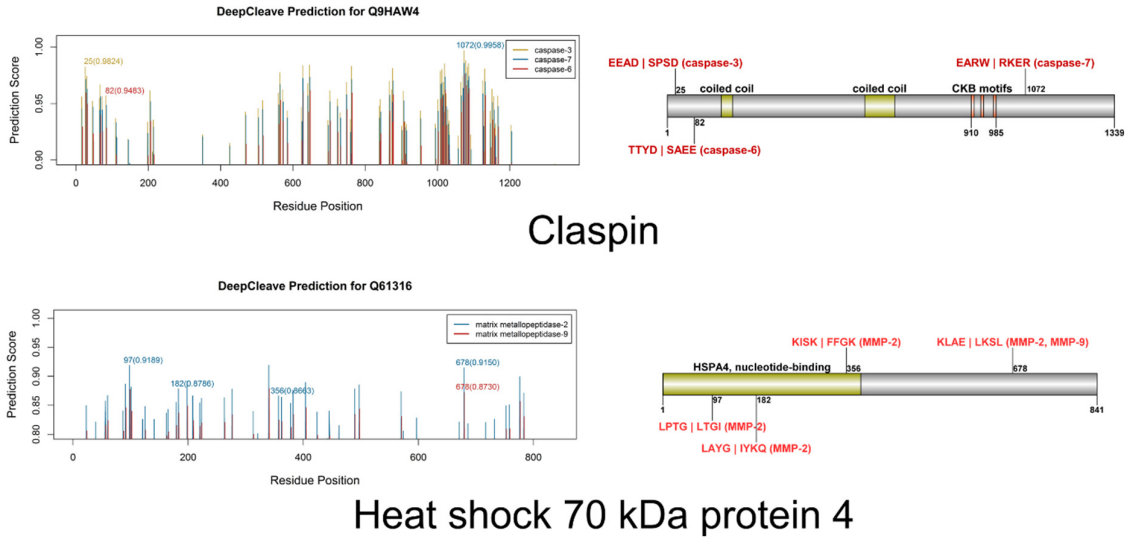

**Figure S5.** Illustration of the predictions generated with DeepCleave webserver for two case study proteins collected from the test dataset: Claspin (top two panels) and Heat shock 70 kDa protein 4 (bottom two panels). The panels of the left summarize predictions generated by DeepCleave while the panels on the right show experimental annotations of the cleavage sites.

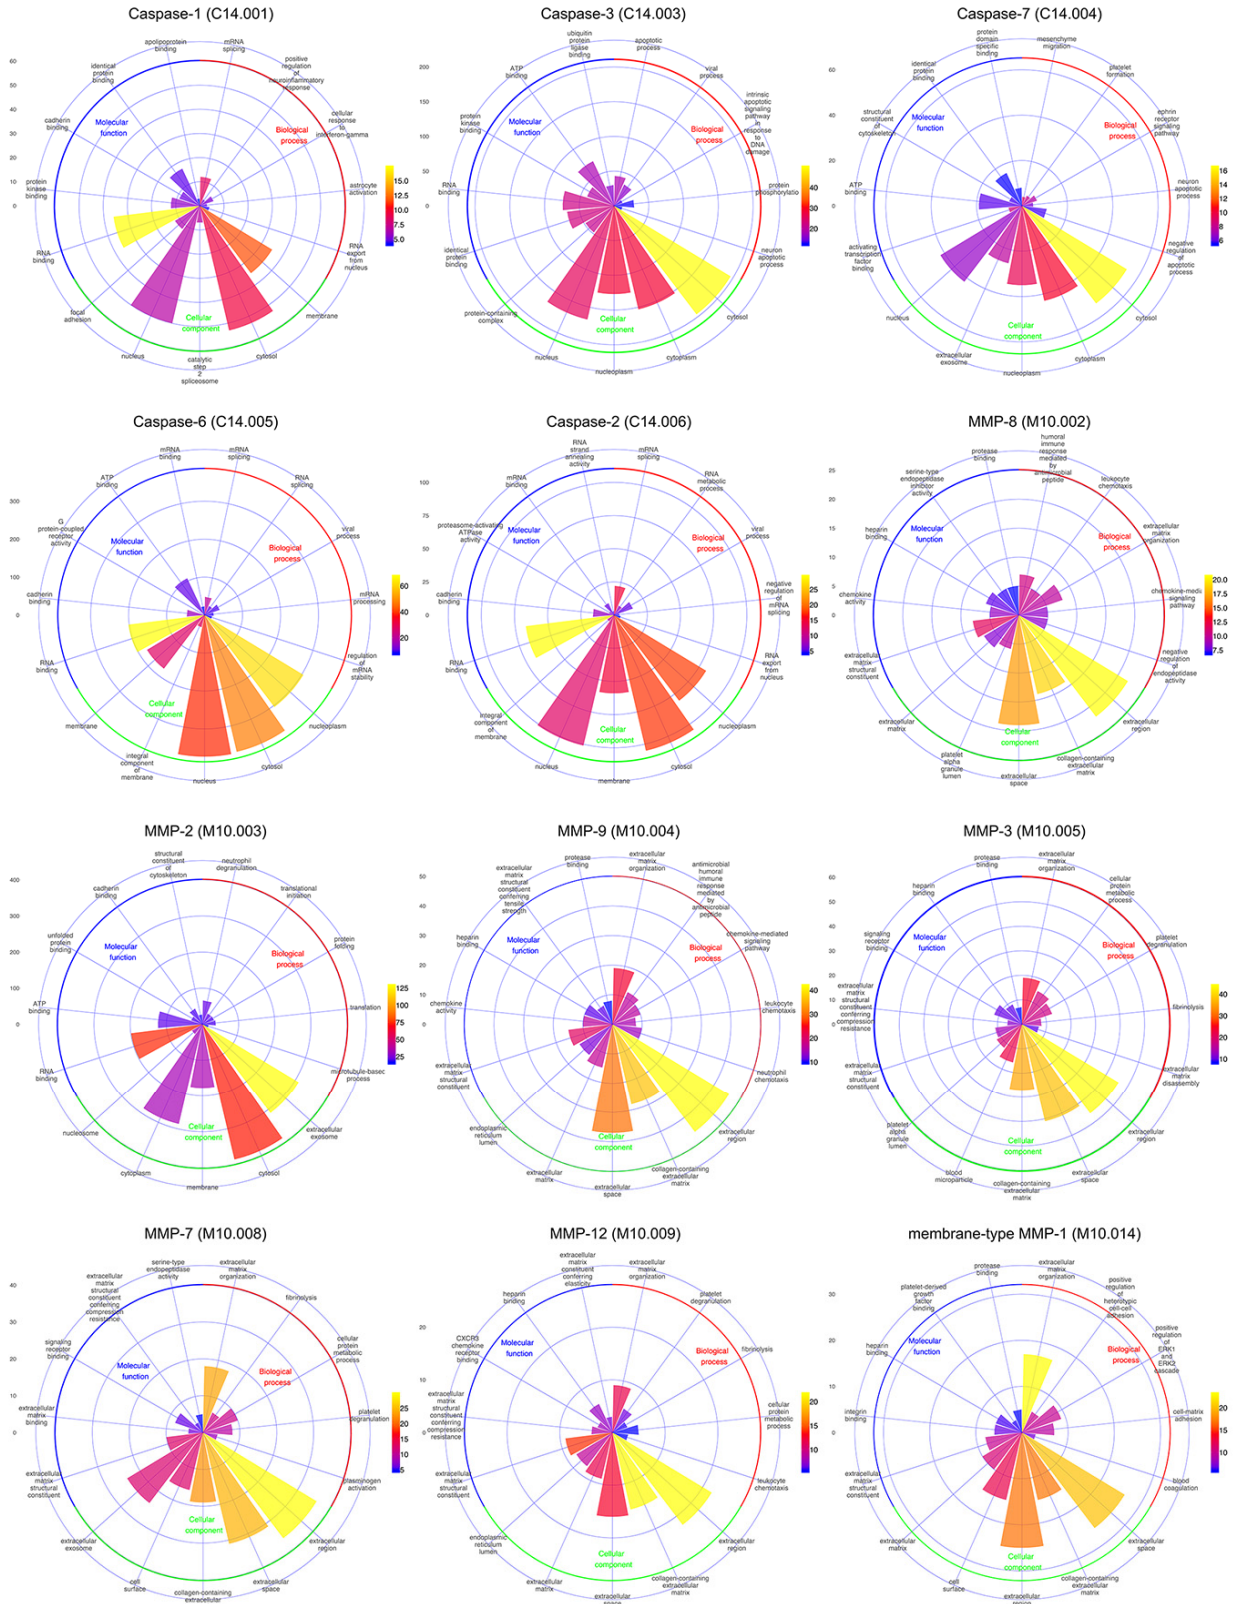

**Figure S6.** Visualization of the enriched Gene Ontology terms for the putative substrates of caspases and MMPs in human.

**Table S1.** Size and composition of the data used to develop the training and test datasets for the caspase and MMP families. We used the CD-HIT program to cluster the sequences to reduce the sequence similarity between the training and test sets to 20%.

| Family   | Protease                   | MEROPS ID | Before CD-HIT        |                          | CD-HIT              |                          |
|----------|----------------------------|-----------|----------------------|--------------------------|---------------------|--------------------------|
|          |                            |           | Number of substrates | Number of cleavage sites | Number of sequences | Number of cleavage sites |
| Caspases | caspase-1                  | C14.001   | 155                  | 177                      | 134                 | 152                      |
|          | CED-3 peptidase            | C14.002   | 7                    | 13                       | 7                   | 13                       |
|          | caspase-3                  | C14.003   | 454                  | 629                      | 324                 | 450                      |
|          | caspase-7                  | C14.004   | 150                  | 178                      | 112                 | 133                      |
|          | caspase-6                  | C14.005   | 923                  | 1306                     | 794                 | 1074                     |
|          | caspase-2                  | C14.006   | 244                  | 289                      | 220                 | 262                      |
|          | caspase-4                  | C14.007   | 8                    | 9                        | 8                   | 9                        |
|          | caspase-5                  | C14.008   | 1                    | 1                        | 1                   | 1                        |
|          | caspase-8                  | C14.009   | 47                   | 66                       | 45                  | 64                       |
|          | caspase-9                  | C14.010   | 11                   | 13                       | 10                  | 12                       |
|          | caspase-10                 | C14.011   | 6                    | 9                        | 6                   | 9                        |
|          | caspase-11                 | C14.012   | 3                    | 4                        | 2                   | 3                        |
|          | caspase-12                 | C14.013   | 2                    | 4                        | 2                   | 4                        |
|          | caspase (insect 1)         | C14.015   | 6                    | 8                        | 6                   | 8                        |
|          | caspase (insect 2)         | C14.016   | 2                    | 3                        | 2                   | 3                        |
|          | caspase-14                 | C14.018   | 14                   | 14                       | 14                  | 14                       |
|          | caspase DRONC              | C14.019   | 2                    | 3                        | 2                   | 3                        |
|          | caspase-15                 | C14.038   | 1                    | 2                        | 1                   | 2                        |
|          | caspase Dredd              | C14.040   | 1                    | 1                        | 1                   | 1                        |
|          | csp-1 g.p.                 | C14.A06   | 3                    | 6                        | 3                   | 6                        |
| Total    |                            |           | 2040                 | 2735                     | 1694                | 2223                     |
| MMPs     | matrix metallopeptidase-1  | M10.001   | 34                   | 67                       | 27                  | 58                       |
|          | matrix metallopeptidase-8  | M10.002   | 34                   | 106                      | 17                  | 67                       |
|          | matrix metallopeptidase-2  | M10.003   | 1555                 | 3373                     | 777                 | 1363                     |
|          | matrix metallopeptidase-9  | M10.004   | 83                   | 349                      | 60                  | 243                      |
|          | matrix metallopeptidase-3  | M10.005   | 62                   | 168                      | 32                  | 87                       |
|          | matrix metallopeptidase-10 | M10.006   | 9                    | 18                       | 7                   | 10                       |
|          | matrix metallopeptidase-11 | M10.007   | 17                   | 20                       | 15                  | 18                       |
|          | matrix metallopeptidase-7  | M10.008   | 60                   | 185                      | 41                  | 152                      |

|                                         |         |      |      |      |      |
|-----------------------------------------|---------|------|------|------|------|
| matrix metallopeptidase-12              | M10.009 | 30   | 217  | 19   | 180  |
| envelysin                               | M10.010 | 2    | 6    | 2    | 6    |
| matrix metallopeptidase-13              | M10.013 | 21   | 59   | 21   | 59   |
| membrane-type matrix metallopeptidase-1 | M10.014 | 46   | 128  | 34   | 74   |
| membrane-type matrix metallopeptidase-2 | M10.015 | 2    | 14   | 1    | 6    |
| membrane-type matrix metallopeptidase-3 | M10.016 | 5    | 20   | 4    | 14   |
| membrane-type matrix metallopeptidase-4 | M10.017 | 5    | 18   | 5    | 18   |
| matrix metallopeptidase-18              | M10.018 | 2    | 2    | 2    | 2    |
| matrix metallopeptidase-20              | M10.019 | 9    | 37   | 6    | 20   |
| matrix metallopeptidase-19              | M10.021 | 4    | 7    | 4    | 7    |
| membrane-type matrix metallopeptidase-5 | M10.023 | 1    | 1    | 1    | 1    |
| membrane-type matrix metallopeptidase-6 | M10.024 | 7    | 45   | 5    | 25   |
| matrix metallopeptidase-26              | M10.029 | 8    | 12   | 8    | 12   |
| At1g59970-type peptidase                | M10.038 | 1    | 1    | 1    | 1    |
| karilysin                               | M10.066 | 1    | 5    | 1    | 5    |
| Total                                   |         | 1998 | 4858 | 1090 | 2428 |

**Table S2.** The number of substrates and cleavage sites for the training dataset.

| Family   | Protease                                | MEROPS ID | Number of substrates | Number of cleavage sites |
|----------|-----------------------------------------|-----------|----------------------|--------------------------|
| Caspases | caspase-1                               | C14.001   | 103                  | 115                      |
|          | CED-3 peptidase                         | C14.002   | 7                    | 13                       |
|          | caspase-3                               | C14.003   | 279                  | 378                      |
|          | caspase-7                               | C14.004   | 85                   | 105                      |
|          | caspase-6                               | C14.005   | 641                  | 880                      |
|          | caspase-2                               | C14.006   | 161                  | 195                      |
|          | caspase-4                               | C14.007   | 8                    | 9                        |
|          | caspase-5                               | C14.008   | 1                    | 1                        |
|          | caspase-8                               | C14.009   | 45                   | 64                       |
|          | caspase-9                               | C14.010   | 10                   | 12                       |
|          | caspase-10                              | C14.011   | 6                    | 9                        |
|          | caspase-11                              | C14.012   | 2                    | 3                        |
|          | caspase-12                              | C14.013   | 2                    | 4                        |
|          | caspase (insect 1)                      | C14.015   | 6                    | 8                        |
|          | caspase (insect 2)                      | C14.016   | 2                    | 3                        |
|          | caspase-14                              | C14.018   | 14                   | 14                       |
|          | caspase DRONC                           | C14.019   | 2                    | 3                        |
|          | caspase-15                              | C14.038   | 1                    | 2                        |
|          | caspase Dredd                           | C14.040   | 1                    | 1                        |
|          | csp-1 g.p.                              | C14.A06   | 3                    | 6                        |
|          | Total                                   |           | 1379                 | 1825                     |
| MMPs     | matrix metallopeptidase-1               | M10.001   | 27                   | 58                       |
|          | matrix metallopeptidase-8               | M10.002   | 19                   | 64                       |
|          | matrix metallopeptidase-2               | M10.003   | 692                  | 1337                     |
|          | matrix metallopeptidase-9               | M10.004   | 54                   | 229                      |
|          | matrix metallopeptidase-3               | M10.005   | 38                   | 96                       |
|          | matrix metallopeptidase-10              | M10.006   | 7                    | 10                       |
|          | matrix metallopeptidase-11              | M10.007   | 15                   | 18                       |
|          | matrix metallopeptidase-7               | M10.008   | 30                   | 120                      |
|          | matrix metallopeptidase-12              | M10.009   | 16                   | 136                      |
|          | envelysin                               | M10.010   | 2                    | 6                        |
|          | matrix metallopeptidase-13              | M10.013   | 21                   | 59                       |
|          | membrane-type matrix metallopeptidase-1 | M10.014   | 25                   | 73                       |
|          | membrane-type matrix metallopeptidase-2 | M10.015   | 1                    | 6                        |
|          | membrane-type matrix metallopeptidase-3 | M10.016   | 4                    | 14                       |

|  |                                          |         |     |      |
|--|------------------------------------------|---------|-----|------|
|  | membrane-type matrix metalloproteinase-4 | M10.017 | 5   | 18   |
|  | matrix metalloproteinase-18              | M10.018 | 2   | 2    |
|  | matrix metalloproteinase-20              | M10.019 | 6   | 20   |
|  | matrix metalloproteinase-19              | M10.021 | 4   | 7    |
|  | membrane-type matrix metalloproteinase-5 | M10.023 | 1   | 1    |
|  | membrane-type matrix metalloproteinase-6 | M10.024 | 5   | 25   |
|  | matrix metalloproteinase-26              | M10.029 | 8   | 12   |
|  | At1g59970-type peptidase                 | M10.038 | 1   | 1    |
|  | karilysin                                | M10.066 | 1   | 5    |
|  | Total                                    |         | 984 | 2317 |



**Table S3.** The number of sequences and cleavage sites in the test dataset.

| <b>Family</b> | <b>Protease</b>                          | <b>Merops ID</b> | <b>Number of substrates</b> | <b>Number of cleavage sites</b> |
|---------------|------------------------------------------|------------------|-----------------------------|---------------------------------|
| Caspases      | caspase-1                                | C14.001          | 38                          | 44                              |
|               | caspase-3                                | C14.003          | 93                          | 141                             |
|               | caspase-7                                | C14.004          | 36                          | 39                              |
|               | caspase-6                                | C14.005          | 228                         | 300                             |
|               | caspase-2                                | C14.006          | 72                          | 81                              |
|               |                                          | Total            |                             | 467                             |
| MMPs          | matrix metalloproteinase-8               | M10.002          | 6                           | 20                              |
|               | matrix metalloproteinase-2               | M10.003          | 242                         | 463                             |
|               | matrix metalloproteinase-9               | M10.004          | 21                          | 54                              |
|               | matrix metalloproteinase-3               | M10.005          | 9                           | 21                              |
|               | matrix metalloproteinase-7               | M10.008          | 19                          | 44                              |
|               | matrix metalloproteinase-12              | M10.009          | 9                           | 59                              |
|               | membrane-type matrix metalloproteinase-1 | M10.014          | 15                          | 24                              |
|               |                                          | Total            |                             | 321                             |

**Table S4.** Predictive performance for the prediction of the substrate cleavage sites for 5 proteases from caspase family for the DeepCleave trained without the transfer learning (original) and DeepCleave trained with transfer learning (transfer): C14.001 (caspase-1), C14.003 (caspase-3), C14.004 (caspase-7), C14.005 (caspase-6) and C14.006 (caspase-2). The results were evaluated in terms of MCC, ACC (Accuracy), Sensitivity (Sn), Specificity (Sp), Precision, and AUC on the test dataset.

| Merops ID | Models            | MCC    | ACC    | Sensitivity | Specificity | Precision | AUC    |        |
|-----------|-------------------|--------|--------|-------------|-------------|-----------|--------|--------|
| C14.001   | original          | 1      | 0.9199 | 0.9583      | 0.9167      | 1.0000    | 1.0000 | 1.0000 |
|           |                   | 2      | 0.9199 | 0.9583      | 0.9167      | 1.0000    | 1.0000 | 1.0000 |
|           |                   | 3      | 0.9199 | 0.9583      | 0.9167      | 1.0000    | 1.0000 | 1.0000 |
|           |                   | 4      | 0.9199 | 0.9583      | 0.9167      | 1.0000    | 1.0000 | 1.0000 |
|           |                   | 5      | 0.9199 | 0.9583      | 0.9167      | 1.0000    | 1.0000 | 1.0000 |
|           | transfer learning | 1      | 1.0000 | 1.0000      | 1.0000      | 1.0000    | 1.0000 | 1.0000 |
|           |                   | 2      | 0.9199 | 0.9583      | 0.9167      | 1.0000    | 1.0000 | 0.9931 |
|           |                   | 3      | 0.9199 | 0.9583      | 0.9167      | 1.0000    | 1.0000 | 0.9931 |
|           |                   | 4      | 0.9199 | 0.9583      | 0.9167      | 1.0000    | 1.0000 | 0.9931 |
|           |                   | 5      | 0.9199 | 0.9583      | 0.9167      | 1.0000    | 1.0000 | 0.9931 |
|           |                   | 6      | 1.0000 | 1.0000      | 1.0000      | 1.0000    | 1.0000 | 1.0000 |
|           |                   | 7      | 1.0000 | 1.0000      | 1.0000      | 1.0000    | 1.0000 | 1.0000 |
|           |                   | 8      | 1.0000 | 1.0000      | 1.0000      | 1.0000    | 1.0000 | 1.0000 |
|           |                   | 9      | 1.0000 | 1.0000      | 1.0000      | 1.0000    | 1.0000 | 1.0000 |
|           |                   | 10     | 1.0000 | 1.0000      | 1.0000      | 1.0000    | 1.0000 | 1.0000 |
|           |                   | 11     | 1.0000 | 1.0000      | 1.0000      | 1.0000    | 1.0000 | 1.0000 |
|           |                   | 12     | 1.0000 | 1.0000      | 1.0000      | 1.0000    | 1.0000 | 1.0000 |
|           |                   | 13     | 1.0000 | 1.0000      | 1.0000      | 1.0000    | 1.0000 | 1.0000 |
|           |                   | 14     | 1.0000 | 1.0000      | 1.0000      | 1.0000    | 1.0000 | 1.0000 |
|           |                   | 15     | 1.0000 | 1.0000      | 1.0000      | 1.0000    | 1.0000 | 1.0000 |
|           |                   | 16     | 0.9199 | 0.9583      | 0.9167      | 1.0000    | 1.0000 | 0.9583 |
|           |                   | 17     | 0.9199 | 0.9583      | 0.9167      | 1.0000    | 1.0000 | 0.9583 |
|           |                   | 18     | 0.9199 | 0.9583      | 0.9167      | 1.0000    | 1.0000 | 0.9583 |
|           |                   | 19     | 0.9199 | 0.9583      | 0.9167      | 1.0000    | 1.0000 | 0.9583 |
|           |                   | 20     | 0.9199 | 0.9583      | 0.9167      | 1.0000    | 1.0000 | 0.9583 |
| 21        | 1.0000            | 1.0000 | 1.0000 | 1.0000      | 1.0000      | 1.0000    |        |        |
| 22        | 1.0000            | 1.0000 | 1.0000 | 1.0000      | 1.0000      | 1.0000    |        |        |
| 23        | 1.0000            | 1.0000 | 1.0000 | 1.0000      | 1.0000      | 1.0000    |        |        |
| 24        | 1.0000            | 1.0000 | 1.0000 | 1.0000      | 1.0000      | 1.0000    |        |        |
| 25        | 1.0000            | 1.0000 | 1.0000 | 1.0000      | 1.0000      | 1.0000    |        |        |
| C14.003   | original          | 1      | 0.9740 | 0.9868      | 1.0000      | 0.9737    | 0.9744 | 0.9972 |
|           |                   | 2      | 0.9740 | 0.9868      | 1.0000      | 0.9737    | 0.9744 | 0.9986 |
|           |                   | 3      | 0.9474 | 0.9737      | 0.9737      | 0.9737    | 0.9737 | 0.9882 |
|           |                   | 4      | 0.9740 | 0.9868      | 1.0000      | 0.9737    | 0.9744 | 0.9979 |

|         |                   |    |        |        |        |        |        |        |
|---------|-------------------|----|--------|--------|--------|--------|--------|--------|
|         |                   | 5  | 0.9740 | 0.9868 | 1.0000 | 0.9737 | 0.9744 | 0.9958 |
|         |                   | 1  | 0.9740 | 0.9868 | 1.0000 | 0.9737 | 0.9744 | 0.9979 |
|         |                   | 2  | 0.9740 | 0.9868 | 1.0000 | 0.9737 | 0.9744 | 0.9979 |
|         |                   | 3  | 0.9740 | 0.9868 | 1.0000 | 0.9737 | 0.9744 | 0.9979 |
|         |                   | 4  | 0.9740 | 0.9868 | 1.0000 | 0.9737 | 0.9744 | 0.9979 |
|         |                   | 5  | 0.9740 | 0.9868 | 1.0000 | 0.9737 | 0.9744 | 0.9979 |
|         |                   | 6  | 0.9740 | 0.9868 | 1.0000 | 0.9737 | 0.9744 | 0.9979 |
|         |                   | 7  | 0.9740 | 0.9868 | 1.0000 | 0.9737 | 0.9744 | 0.9979 |
|         |                   | 8  | 0.9740 | 0.9868 | 1.0000 | 0.9737 | 0.9744 | 0.9979 |
|         |                   | 9  | 0.9740 | 0.9868 | 1.0000 | 0.9737 | 0.9744 | 0.9979 |
|         |                   | 10 | 0.9740 | 0.9868 | 1.0000 | 0.9737 | 0.9744 | 0.9979 |
|         |                   | 11 | 0.9740 | 0.9868 | 1.0000 | 0.9737 | 0.9744 | 0.9979 |
|         | transfer learning | 12 | 0.9740 | 0.9868 | 1.0000 | 0.9737 | 0.9744 | 0.9979 |
|         |                   | 13 | 0.9740 | 0.9868 | 1.0000 | 0.9737 | 0.9744 | 0.9979 |
|         |                   | 14 | 0.9740 | 0.9868 | 1.0000 | 0.9737 | 0.9744 | 0.9979 |
|         |                   | 15 | 0.9740 | 0.9868 | 1.0000 | 0.9737 | 0.9744 | 0.9979 |
|         |                   | 16 | 0.9740 | 0.9868 | 1.0000 | 0.9737 | 0.9744 | 0.9979 |
|         |                   | 17 | 0.9740 | 0.9868 | 1.0000 | 0.9737 | 0.9744 | 0.9979 |
|         |                   | 18 | 0.9740 | 0.9868 | 1.0000 | 0.9737 | 0.9744 | 0.9979 |
|         |                   | 19 | 0.9740 | 0.9868 | 1.0000 | 0.9737 | 0.9744 | 0.9979 |
|         |                   | 20 | 0.9740 | 0.9868 | 1.0000 | 0.9737 | 0.9744 | 0.9979 |
|         |                   | 21 | 0.9740 | 0.9868 | 1.0000 | 0.9737 | 0.9744 | 0.9972 |
|         |                   | 22 | 0.9740 | 0.9868 | 1.0000 | 0.9737 | 0.9744 | 0.9972 |
|         |                   | 23 | 0.9740 | 0.9868 | 1.0000 | 0.9737 | 0.9744 | 0.9972 |
|         |                   | 24 | 0.9740 | 0.9868 | 1.0000 | 0.9737 | 0.9744 | 0.9972 |
|         |                   | 25 | 0.9740 | 0.9868 | 1.0000 | 0.9737 | 0.9744 | 0.9972 |
|         |                   | 1  | 0.9129 | 0.9545 | 1.0000 | 0.9091 | 0.9167 | 0.9917 |
|         |                   | 2  | 0.9129 | 0.9545 | 0.9091 | 1.0000 | 1.0000 | 0.9752 |
|         | original          | 3  | 0.9129 | 0.9545 | 0.9091 | 1.0000 | 1.0000 | 0.9835 |
|         |                   | 4  | 0.9129 | 0.9545 | 0.9091 | 1.0000 | 1.0000 | 0.9587 |
|         |                   | 5  | 0.9129 | 0.9545 | 0.9091 | 1.0000 | 1.0000 | 0.9256 |
|         |                   | 1  | 1.0000 | 1.0000 | 1.0000 | 1.0000 | 1.0000 | 1.0000 |
|         |                   | 2  | 1.0000 | 1.0000 | 1.0000 | 1.0000 | 1.0000 | 1.0000 |
| C14.004 |                   | 3  | 1.0000 | 1.0000 | 1.0000 | 1.0000 | 1.0000 | 1.0000 |
|         |                   | 4  | 1.0000 | 1.0000 | 1.0000 | 1.0000 | 1.0000 | 1.0000 |
|         | transfer learning | 5  | 1.0000 | 1.0000 | 1.0000 | 1.0000 | 1.0000 | 1.0000 |
|         |                   | 6  | 1.0000 | 1.0000 | 1.0000 | 1.0000 | 1.0000 | 1.0000 |
|         |                   | 7  | 1.0000 | 1.0000 | 1.0000 | 1.0000 | 1.0000 | 1.0000 |
|         |                   | 8  | 1.0000 | 1.0000 | 1.0000 | 1.0000 | 1.0000 | 1.0000 |
|         |                   | 9  | 1.0000 | 1.0000 | 1.0000 | 1.0000 | 1.0000 | 1.0000 |
|         |                   | 10 | 1.0000 | 1.0000 | 1.0000 | 1.0000 | 1.0000 | 1.0000 |

|  |                   |    |        |        |        |        |        |        |
|--|-------------------|----|--------|--------|--------|--------|--------|--------|
|  |                   | 11 | 1.0000 | 1.0000 | 1.0000 | 1.0000 | 1.0000 | 1.0000 |
|  |                   | 12 | 1.0000 | 1.0000 | 1.0000 | 1.0000 | 1.0000 | 1.0000 |
|  |                   | 13 | 1.0000 | 1.0000 | 1.0000 | 1.0000 | 1.0000 | 1.0000 |
|  |                   | 14 | 1.0000 | 1.0000 | 1.0000 | 1.0000 | 1.0000 | 1.0000 |
|  |                   | 15 | 1.0000 | 1.0000 | 1.0000 | 1.0000 | 1.0000 | 1.0000 |
|  |                   | 16 | 1.0000 | 1.0000 | 1.0000 | 1.0000 | 1.0000 | 1.0000 |
|  |                   | 17 | 1.0000 | 1.0000 | 1.0000 | 1.0000 | 1.0000 | 1.0000 |
|  |                   | 18 | 1.0000 | 1.0000 | 1.0000 | 1.0000 | 1.0000 | 1.0000 |
|  |                   | 19 | 1.0000 | 1.0000 | 1.0000 | 1.0000 | 1.0000 | 1.0000 |
|  |                   | 20 | 1.0000 | 1.0000 | 1.0000 | 1.0000 | 1.0000 | 1.0000 |
|  |                   | 21 | 1.0000 | 1.0000 | 1.0000 | 1.0000 | 1.0000 | 1.0000 |
|  |                   | 22 | 1.0000 | 1.0000 | 1.0000 | 1.0000 | 1.0000 | 1.0000 |
|  |                   | 23 | 1.0000 | 1.0000 | 1.0000 | 1.0000 | 1.0000 | 1.0000 |
|  |                   | 24 | 1.0000 | 1.0000 | 1.0000 | 1.0000 | 1.0000 | 1.0000 |
|  |                   | 25 | 1.0000 | 1.0000 | 1.0000 | 1.0000 | 1.0000 | 1.0000 |
|  |                   | 1  | 0.9660 | 0.9830 | 0.9773 | 0.9886 | 0.9885 | 0.9963 |
|  |                   | 2  | 0.9665 | 0.9830 | 1.0000 | 0.9659 | 0.9670 | 0.9944 |
|  | original          | 3  | 0.9548 | 0.9773 | 0.9886 | 0.9659 | 0.9667 | 0.9948 |
|  |                   | 4  | 0.9548 | 0.9773 | 0.9886 | 0.9659 | 0.9667 | 0.9943 |
|  |                   | 5  | 0.9555 | 0.9773 | 1.0000 | 0.9545 | 0.9565 | 0.9929 |
|  |                   | 1  | 0.9545 | 0.9773 | 0.9773 | 0.9773 | 0.9773 | 0.9919 |
|  |                   | 2  | 0.9545 | 0.9773 | 0.9773 | 0.9773 | 0.9773 | 0.9919 |
|  |                   | 3  | 0.9545 | 0.9773 | 0.9773 | 0.9773 | 0.9773 | 0.9919 |
|  |                   | 4  | 0.9545 | 0.9773 | 0.9773 | 0.9773 | 0.9773 | 0.9917 |
|  |                   | 5  | 0.9545 | 0.9773 | 0.9773 | 0.9773 | 0.9773 | 0.9919 |
|  |                   | 6  | 0.9555 | 0.9773 | 1.0000 | 0.9545 | 0.9565 | 0.9884 |
|  |                   | 7  | 0.9555 | 0.9773 | 1.0000 | 0.9545 | 0.9565 | 0.9881 |
|  | C14.005           | 8  | 0.9555 | 0.9773 | 1.0000 | 0.9545 | 0.9565 | 0.9880 |
|  |                   | 9  | 0.9555 | 0.9773 | 1.0000 | 0.9545 | 0.9565 | 0.9881 |
|  |                   | 10 | 0.9555 | 0.9773 | 1.0000 | 0.9545 | 0.9565 | 0.9880 |
|  | transfer learning | 11 | 0.9555 | 0.9773 | 1.0000 | 0.9545 | 0.9565 | 0.9952 |
|  |                   | 12 | 0.9555 | 0.9773 | 1.0000 | 0.9545 | 0.9565 | 0.9951 |
|  |                   | 13 | 0.9555 | 0.9773 | 1.0000 | 0.9545 | 0.9565 | 0.9952 |
|  |                   | 14 | 0.9555 | 0.9773 | 1.0000 | 0.9545 | 0.9565 | 0.9951 |
|  |                   | 15 | 0.9555 | 0.9773 | 1.0000 | 0.9545 | 0.9565 | 0.9951 |
|  |                   | 16 | 0.9548 | 0.9773 | 0.9886 | 0.9659 | 0.9667 | 0.9921 |
|  |                   | 17 | 0.9548 | 0.9773 | 0.9886 | 0.9659 | 0.9667 | 0.9923 |
|  |                   | 18 | 0.9548 | 0.9773 | 0.9886 | 0.9659 | 0.9667 | 0.9920 |
|  |                   | 19 | 0.9548 | 0.9773 | 0.9886 | 0.9659 | 0.9667 | 0.9919 |
|  |                   | 20 | 0.9548 | 0.9773 | 0.9886 | 0.9659 | 0.9667 | 0.9925 |
|  |                   | 21 | 0.9548 | 0.9773 | 0.9886 | 0.9659 | 0.9667 | 0.9879 |

|         |                   |    |        |        |        |        |        |        |
|---------|-------------------|----|--------|--------|--------|--------|--------|--------|
|         |                   | 22 | 0.9548 | 0.9773 | 0.9886 | 0.9659 | 0.9667 | 0.9876 |
|         |                   | 23 | 0.9548 | 0.9773 | 0.9886 | 0.9659 | 0.9667 | 0.9879 |
|         |                   | 24 | 0.9548 | 0.9773 | 0.9886 | 0.9659 | 0.9667 | 0.9876 |
|         |                   | 25 | 0.9548 | 0.9773 | 0.9886 | 0.9659 | 0.9667 | 0.9876 |
|         |                   | 1  | 0.9512 | 0.9750 | 1.0000 | 0.9500 | 0.9524 | 0.9975 |
|         |                   | 2  | 0.9512 | 0.9750 | 1.0000 | 0.9500 | 0.9524 | 0.9925 |
|         | original          | 3  | 0.9512 | 0.9750 | 1.0000 | 0.9500 | 0.9524 | 0.9900 |
|         |                   | 4  | 0.9000 | 0.9500 | 0.9500 | 0.9500 | 0.9500 | 0.9775 |
|         |                   | 5  | 0.9512 | 0.9750 | 1.0000 | 0.9500 | 0.9524 | 0.9925 |
|         |                   | 1  | 0.9512 | 0.9750 | 1.0000 | 0.9500 | 0.9524 | 0.9975 |
|         |                   | 2  | 0.9512 | 0.9750 | 1.0000 | 0.9500 | 0.9524 | 0.9975 |
|         |                   | 3  | 0.9512 | 0.9750 | 1.0000 | 0.9500 | 0.9524 | 0.9975 |
|         |                   | 4  | 0.9512 | 0.9750 | 1.0000 | 0.9500 | 0.9524 | 0.9975 |
|         |                   | 5  | 0.9512 | 0.9750 | 1.0000 | 0.9500 | 0.9524 | 0.9975 |
|         |                   | 6  | 0.9512 | 0.9750 | 1.0000 | 0.9500 | 0.9524 | 0.9975 |
|         |                   | 7  | 0.9512 | 0.9750 | 1.0000 | 0.9500 | 0.9524 | 0.9975 |
|         |                   | 8  | 0.9512 | 0.9750 | 1.0000 | 0.9500 | 0.9524 | 0.9975 |
|         |                   | 9  | 0.9512 | 0.9750 | 1.0000 | 0.9500 | 0.9524 | 0.9975 |
| C14.006 |                   | 10 | 0.9512 | 0.9750 | 1.0000 | 0.9500 | 0.9524 | 0.9975 |
|         |                   | 11 | 1.0000 | 1.0000 | 1.0000 | 1.0000 | 1.0000 | 1.0000 |
|         |                   | 12 | 1.0000 | 1.0000 | 1.0000 | 1.0000 | 1.0000 | 1.0000 |
|         | transfer learning | 13 | 1.0000 | 1.0000 | 1.0000 | 1.0000 | 1.0000 | 1.0000 |
|         |                   | 14 | 1.0000 | 1.0000 | 1.0000 | 1.0000 | 1.0000 | 1.0000 |
|         |                   | 15 | 1.0000 | 1.0000 | 1.0000 | 1.0000 | 1.0000 | 1.0000 |
|         |                   | 16 | 1.0000 | 1.0000 | 1.0000 | 1.0000 | 1.0000 | 1.0000 |
|         |                   | 17 | 1.0000 | 1.0000 | 1.0000 | 1.0000 | 1.0000 | 1.0000 |
|         |                   | 18 | 1.0000 | 1.0000 | 1.0000 | 1.0000 | 1.0000 | 1.0000 |
|         |                   | 19 | 1.0000 | 1.0000 | 1.0000 | 1.0000 | 1.0000 | 1.0000 |
|         |                   | 20 | 1.0000 | 1.0000 | 1.0000 | 1.0000 | 1.0000 | 1.0000 |
|         |                   | 21 | 0.9512 | 0.9750 | 1.0000 | 0.9500 | 0.9524 | 0.9975 |
|         |                   | 22 | 0.9512 | 0.9750 | 1.0000 | 0.9500 | 0.9524 | 0.9975 |
|         |                   | 23 | 0.9512 | 0.9750 | 1.0000 | 0.9500 | 0.9524 | 0.9975 |
|         |                   | 24 | 0.9512 | 0.9750 | 1.0000 | 0.9500 | 0.9524 | 0.9975 |
|         |                   | 25 | 0.9512 | 0.9750 | 1.0000 | 0.9500 | 0.9524 | 0.9975 |

**Table S5.** Predictive performance for the prediction of the substrate cleavage sites for 7 proteases from MMP family for the DeepCleave trained without the transfer learning (original) and DeepCleave trained with transfer learning (transfer): M10.002(matrix metallopeptidase-8), M10.003 (matrix metallopeptidase-2), M10.004 (matrix metallopeptidase-9), M10.005 (matrix metallopeptidase-3), M10.008 (matrix metallopeptidase-7), M10.009 (matrix metallopeptidase-12) and M10.014 (membrane-type matrix metallopeptidase-1). The results were evaluated in terms of MCC, ACC (Accuracy), Sensitivity (Sn), Specificity (Sp), Precision, and AUC on the test dataset.

| Merops ID | Models            | MCC | ACC    | Sensitivity | Specificity | Precision | AUC    |        |
|-----------|-------------------|-----|--------|-------------|-------------|-----------|--------|--------|
|           | original          | 1   | 0.4082 | 0.6429      | 0.2857      | 1.0000    | 1.0000 | 0.9184 |
|           |                   | 2   | 0.4082 | 0.6429      | 0.2857      | 1.0000    | 1.0000 | 1.0000 |
|           |                   | 3   | 0.6325 | 0.7857      | 1.0000      | 0.5714    | 0.7000 | 1.0000 |
|           |                   | 4   | 0.5222 | 0.7143      | 0.4286      | 1.0000    | 1.0000 | 1.0000 |
|           |                   | 5   | 0.2774 | 0.5714      | 0.1429      | 1.0000    | 1.0000 | 1.0000 |
| M10.002   | transfer learning | 1   | 1.0000 | 1.0000      | 1.0000      | 1.0000    | 1.0000 | 1.0000 |
|           |                   | 2   | 1.0000 | 1.0000      | 1.0000      | 1.0000    | 1.0000 | 1.0000 |
|           |                   | 3   | 1.0000 | 1.0000      | 1.0000      | 1.0000    | 1.0000 | 1.0000 |
|           |                   | 4   | 1.0000 | 1.0000      | 1.0000      | 1.0000    | 1.0000 | 1.0000 |
|           |                   | 5   | 1.0000 | 1.0000      | 1.0000      | 1.0000    | 1.0000 | 1.0000 |
|           |                   | 6   | 1.0000 | 1.0000      | 1.0000      | 1.0000    | 1.0000 | 1.0000 |
|           |                   | 7   | 1.0000 | 1.0000      | 1.0000      | 1.0000    | 1.0000 | 1.0000 |
|           |                   | 8   | 1.0000 | 1.0000      | 1.0000      | 1.0000    | 1.0000 | 1.0000 |
|           |                   | 9   | 1.0000 | 1.0000      | 1.0000      | 1.0000    | 1.0000 | 1.0000 |
|           |                   | 10  | 1.0000 | 1.0000      | 1.0000      | 1.0000    | 1.0000 | 1.0000 |
|           |                   | 11  | 1.0000 | 1.0000      | 1.0000      | 1.0000    | 1.0000 | 1.0000 |
|           |                   | 12  | 1.0000 | 1.0000      | 1.0000      | 1.0000    | 1.0000 | 1.0000 |
|           |                   | 13  | 1.0000 | 1.0000      | 1.0000      | 1.0000    | 1.0000 | 1.0000 |
|           |                   | 14  | 1.0000 | 1.0000      | 1.0000      | 1.0000    | 1.0000 | 1.0000 |
|           |                   | 15  | 1.0000 | 1.0000      | 1.0000      | 1.0000    | 1.0000 | 1.0000 |
|           |                   | 16  | 0.8660 | 0.9286      | 1.0000      | 0.8571    | 0.8750 | 0.9796 |
|           |                   | 17  | 0.8660 | 0.9286      | 1.0000      | 0.8571    | 0.8750 | 0.9796 |
|           |                   | 18  | 0.8660 | 0.9286      | 1.0000      | 0.8571    | 0.8750 | 0.9796 |
|           |                   | 19  | 0.8660 | 0.9286      | 1.0000      | 0.8571    | 0.8750 | 0.9796 |
|           |                   | 20  | 0.8660 | 0.9286      | 1.0000      | 0.8571    | 0.8750 | 0.9796 |
|           |                   | 21  | 1.0000 | 1.0000      | 1.0000      | 1.0000    | 1.0000 | 1.0000 |
|           |                   | 22  | 1.0000 | 1.0000      | 1.0000      | 1.0000    | 1.0000 | 1.0000 |
|           |                   | 23  | 1.0000 | 1.0000      | 1.0000      | 1.0000    | 1.0000 | 1.0000 |
|           |                   | 24  | 1.0000 | 1.0000      | 1.0000      | 1.0000    | 1.0000 | 1.0000 |
|           |                   | 25  | 1.0000 | 1.0000      | 1.0000      | 1.0000    | 1.0000 | 1.0000 |
| M10.003   | original          | 1   | -      | -           | -           | -         | -      | 0.5    |
|           |                   | 2   | -      | -           | -           | -         | -      | 0.5    |
|           |                   | 3   | -      | -           | -           | -         | -      | 0.5    |

|                   |    |         |        |        |        |        |        |
|-------------------|----|---------|--------|--------|--------|--------|--------|
|                   | 4  | -       | -      | -      | -      | -      | 0.5    |
|                   | 5  | -       | -      | -      | -      | -      | 0.5    |
|                   | 1  | 0.8362  | 0.9179 | 0.9030 | 0.9328 | 0.9308 | 0.9681 |
|                   | 2  | 0.8439  | 0.9216 | 0.9030 | 0.9403 | 0.9380 | 0.9684 |
|                   | 3  | 0.8362  | 0.9179 | 0.9030 | 0.9328 | 0.9308 | 0.9681 |
|                   | 4  | 0.8362  | 0.9179 | 0.9030 | 0.9328 | 0.9308 | 0.9678 |
|                   | 5  | 0.8439  | 0.9216 | 0.9030 | 0.9403 | 0.9380 | 0.9685 |
|                   | 6  | 0.8209  | 0.9104 | 0.9104 | 0.9104 | 0.9104 | 0.9622 |
|                   | 7  | 0.8209  | 0.9104 | 0.9104 | 0.9104 | 0.9104 | 0.9603 |
|                   | 8  | 0.8209  | 0.9104 | 0.9104 | 0.9104 | 0.9104 | 0.9622 |
|                   | 9  | 0.8373  | 0.9179 | 0.8881 | 0.9478 | 0.9444 | 0.9611 |
|                   | 10 | 0.8209  | 0.9104 | 0.9104 | 0.9104 | 0.9104 | 0.9623 |
|                   | 11 | 0.7836  | 0.8918 | 0.8955 | 0.8881 | 0.8889 | 0.9607 |
|                   | 12 | 0.7996  | 0.8993 | 0.8731 | 0.9254 | 0.9213 | 0.9607 |
| transfer learning | 13 | 0.7987  | 0.8993 | 0.8881 | 0.9104 | 0.9084 | 0.9615 |
|                   | 14 | 0.7996  | 0.8993 | 0.8731 | 0.9254 | 0.9213 | 0.9615 |
|                   | 15 | 0.7996  | 0.8993 | 0.8731 | 0.9254 | 0.9213 | 0.9616 |
|                   | 16 | 0.8433  | 0.9216 | 0.9254 | 0.9179 | 0.9185 | 0.9628 |
|                   | 17 | 0.8508  | 0.9254 | 0.9328 | 0.9179 | 0.9191 | 0.9676 |
|                   | 18 | 0.8433  | 0.9216 | 0.9254 | 0.9179 | 0.9185 | 0.9639 |
|                   | 19 | 0.8507  | 0.9254 | 0.9254 | 0.9254 | 0.9254 | 0.9684 |
|                   | 20 | 0.8507  | 0.9254 | 0.9254 | 0.9254 | 0.9254 | 0.9680 |
|                   | 21 | 0.8284  | 0.9142 | 0.9179 | 0.9104 | 0.9111 | 0.9661 |
|                   | 22 | 0.8359  | 0.9179 | 0.9254 | 0.9104 | 0.9118 | 0.9662 |
|                   | 23 | 0.8359  | 0.9179 | 0.9254 | 0.9104 | 0.9118 | 0.9669 |
|                   | 24 | 0.8359  | 0.9179 | 0.9254 | 0.9104 | 0.9118 | 0.9669 |
|                   | 25 | 0.8359  | 0.9179 | 0.9254 | 0.9104 | 0.9118 | 0.9663 |
|                   | 1  | 0.4564  | 0.7174 | 0.5652 | 0.8696 | 0.8125 | 0.6786 |
|                   | 2  | 0.0510  | 0.5217 | 0.2609 | 0.7826 | 0.5455 | 0.3516 |
| original          | 3  | 0.0436  | 0.5217 | 0.5652 | 0.4783 | 0.5200 | 0.4858 |
|                   | 4  | -0.1325 | 0.4348 | 0.5217 | 0.3478 | 0.4444 | 0.3327 |
|                   | 5  | 0.0464  | 0.5217 | 0.3478 | 0.6957 | 0.5333 | 0.4216 |
|                   | 1  | 0.6623  | 0.8261 | 0.9130 | 0.7391 | 0.7778 | 0.8110 |
|                   | 2  | 0.6093  | 0.8043 | 0.8261 | 0.7826 | 0.7917 | 0.8110 |
| M10.004           | 3  | 0.6093  | 0.8043 | 0.8261 | 0.7826 | 0.7917 | 0.8110 |
|                   | 4  | 0.6093  | 0.8043 | 0.8261 | 0.7826 | 0.7917 | 0.8129 |
| transfer learning | 5  | 0.6093  | 0.8043 | 0.8261 | 0.7826 | 0.7917 | 0.8110 |
|                   | 6  | 0.6547  | 0.8261 | 0.8696 | 0.7826 | 0.8000 | 0.8488 |
|                   | 7  | 0.6547  | 0.8261 | 0.8696 | 0.7826 | 0.8000 | 0.8507 |
|                   | 8  | 0.6547  | 0.8261 | 0.8696 | 0.7826 | 0.8000 | 0.8488 |
|                   | 9  | 0.6547  | 0.8261 | 0.8696 | 0.7826 | 0.8000 | 0.8507 |

|         |                   |    |        |        |        |        |        |        |
|---------|-------------------|----|--------|--------|--------|--------|--------|--------|
|         |                   | 10 | 0.6547 | 0.8261 | 0.8696 | 0.7826 | 0.8000 | 0.8488 |
|         |                   | 11 | 0.5262 | 0.7609 | 0.8261 | 0.6957 | 0.7308 | 0.8072 |
|         |                   | 12 | 0.5262 | 0.7609 | 0.8261 | 0.6957 | 0.7308 | 0.8015 |
|         |                   | 13 | 0.5222 | 0.7609 | 0.7826 | 0.7391 | 0.7500 | 0.8091 |
|         |                   | 14 | 0.5222 | 0.7609 | 0.7826 | 0.7391 | 0.7500 | 0.8072 |
|         |                   | 15 | 0.5262 | 0.7609 | 0.8261 | 0.6957 | 0.7308 | 0.8072 |
|         |                   | 16 | 0.6547 | 0.8261 | 0.7826 | 0.8696 | 0.8571 | 0.7902 |
|         |                   | 17 | 0.6093 | 0.8043 | 0.7826 | 0.8261 | 0.8182 | 0.7807 |
|         |                   | 18 | 0.6139 | 0.8043 | 0.7391 | 0.8696 | 0.8500 | 0.7883 |
|         |                   | 19 | 0.6093 | 0.8043 | 0.7826 | 0.8261 | 0.8182 | 0.7826 |
|         |                   | 20 | 0.6093 | 0.8043 | 0.7826 | 0.8261 | 0.8182 | 0.7826 |
|         |                   | 21 | 0.5652 | 0.7826 | 0.7826 | 0.7826 | 0.7826 | 0.8110 |
|         |                   | 22 | 0.5652 | 0.7826 | 0.7826 | 0.7826 | 0.7826 | 0.8185 |
|         |                   | 23 | 0.6093 | 0.8043 | 0.8261 | 0.7826 | 0.7917 | 0.8223 |
|         |                   | 24 | 0.5652 | 0.7826 | 0.7826 | 0.7826 | 0.7826 | 0.8129 |
|         |                   | 25 | 0.6093 | 0.8043 | 0.8261 | 0.7826 | 0.7917 | 0.8242 |
|         |                   | 1  | 0.7035 | 0.8500 | 0.9000 | 0.8000 | 0.8182 | 0.8900 |
|         |                   | 2  | 1.0000 | 1.0000 | 1.0000 | 1.0000 | 1.0000 | 1.0000 |
|         | original          | 3  | 1.0000 | 1.0000 | 1.0000 | 1.0000 | 1.0000 | 1.0000 |
|         |                   | 4  | 1.0000 | 1.0000 | 1.0000 | 1.0000 | 1.0000 | 1.0000 |
|         |                   | 5  | 0.8165 | 0.9000 | 1.0000 | 0.8000 | 0.8333 | 0.9200 |
|         |                   | 1  | 0.6547 | 0.8000 | 0.6000 | 1.0000 | 1.0000 | 0.7700 |
|         |                   | 2  | 0.6547 | 0.8000 | 0.6000 | 1.0000 | 1.0000 | 0.7700 |
|         |                   | 3  | 0.6547 | 0.8000 | 0.6000 | 1.0000 | 1.0000 | 0.7700 |
|         |                   | 4  | 0.6547 | 0.8000 | 0.6000 | 1.0000 | 1.0000 | 0.7500 |
|         |                   | 5  | 0.6547 | 0.8000 | 0.6000 | 1.0000 | 1.0000 | 0.7600 |
|         |                   | 6  | 0.7338 | 0.8500 | 0.7000 | 1.0000 | 1.0000 | 0.8900 |
|         |                   | 7  | 0.7338 | 0.8500 | 0.7000 | 1.0000 | 1.0000 | 0.8900 |
|         |                   | 8  | 0.7338 | 0.8500 | 0.7000 | 1.0000 | 1.0000 | 0.8900 |
|         |                   | 9  | 0.7338 | 0.8500 | 0.7000 | 1.0000 | 1.0000 | 0.8900 |
| M10.005 |                   | 10 | 0.7338 | 0.8500 | 0.7000 | 1.0000 | 1.0000 | 0.8900 |
|         | transfer learning | 11 | 0.4000 | 0.7000 | 0.7000 | 0.7000 | 0.7000 | 0.6800 |
|         |                   | 12 | 0.3015 | 0.6500 | 0.6000 | 0.7000 | 0.6667 | 0.6700 |
|         |                   | 13 | 0.3015 | 0.6500 | 0.6000 | 0.7000 | 0.6667 | 0.6700 |
|         |                   | 14 | 0.3015 | 0.6500 | 0.6000 | 0.7000 | 0.6667 | 0.6700 |
|         |                   | 15 | 0.4000 | 0.7000 | 0.7000 | 0.7000 | 0.7000 | 0.6800 |
|         |                   | 16 | 0.7338 | 0.8500 | 0.7000 | 1.0000 | 1.0000 | 0.8100 |
|         |                   | 17 | 0.7338 | 0.8500 | 0.7000 | 1.0000 | 1.0000 | 0.7900 |
|         |                   | 18 | 0.7338 | 0.8500 | 0.7000 | 1.0000 | 1.0000 | 0.8100 |
|         |                   | 19 | 0.7338 | 0.8500 | 0.7000 | 1.0000 | 1.0000 | 0.7900 |
|         |                   | 20 | 0.7338 | 0.8500 | 0.7000 | 1.0000 | 1.0000 | 0.7900 |



|         |          |                   |        |        |        |        |        |        |        |
|---------|----------|-------------------|--------|--------|--------|--------|--------|--------|--------|
|         |          | 21                | 0.5025 | 0.7500 | 0.7000 | 0.8000 | 0.7778 | 0.7300 |        |
|         |          | 22                | 0.5025 | 0.7500 | 0.7000 | 0.8000 | 0.7778 | 0.7400 |        |
|         |          | 23                | 0.5025 | 0.7500 | 0.7000 | 0.8000 | 0.7778 | 0.7300 |        |
|         |          | 24                | 0.5025 | 0.7500 | 0.7000 | 0.8000 | 0.7778 | 0.7400 |        |
|         |          | 25                | 0.5025 | 0.7500 | 0.7000 | 0.8000 | 0.7778 | 0.7300 |        |
|         |          | <hr/>             |        |        |        |        |        |        |        |
|         | original | 1                 | 0.8333 | 0.9167 | 0.9167 | 0.9167 | 0.9167 | 0.9722 |        |
|         |          | 2                 | 0.7526 | 0.8750 | 0.9167 | 0.8333 | 0.8462 | 0.9375 |        |
|         |          | 3                 | 0.8452 | 0.9167 | 0.8333 | 1.0000 | 1.0000 | 0.9722 |        |
|         |          | 4                 | 0.5000 | 0.7500 | 0.7500 | 0.7500 | 0.7500 | 0.8472 |        |
|         |          | 5                 | 0.7526 | 0.8750 | 0.9167 | 0.8333 | 0.8462 | 0.9167 |        |
|         |          | <hr/>             |        |        |        |        |        |        |        |
| M10.008 |          | 1                 | 0.7526 | 0.8750 | 0.8333 | 0.9167 | 0.9091 | 0.8750 |        |
|         |          | 2                 | 0.6667 | 0.8333 | 0.8333 | 0.8333 | 0.8333 | 0.8681 |        |
|         |          | 3                 | 0.6667 | 0.8333 | 0.8333 | 0.8333 | 0.8333 | 0.8681 |        |
|         |          | 4                 | 0.7526 | 0.8750 | 0.8333 | 0.9167 | 0.9091 | 0.8750 |        |
|         |          | 5                 | 0.7526 | 0.8750 | 0.8333 | 0.9167 | 0.9091 | 0.8750 |        |
|         |          | transfer learning | 6      | 0.7526 | 0.8750 | 0.9167 | 0.8333 | 0.8462 | 0.9306 |
|         |          |                   | 7      | 0.7526 | 0.8750 | 0.9167 | 0.8333 | 0.8462 | 0.9306 |
|         |          |                   | 8      | 0.7526 | 0.8750 | 0.9167 | 0.8333 | 0.8462 | 0.9375 |
|         |          |                   | 9      | 0.7526 | 0.8750 | 0.9167 | 0.8333 | 0.8462 | 0.9375 |
|         |          |                   | 10     | 0.7526 | 0.8750 | 0.9167 | 0.8333 | 0.8462 | 0.9167 |
|         |          |                   | 11     | 0.5854 | 0.7917 | 0.8333 | 0.7500 | 0.7692 | 0.8472 |
|         |          |                   | 12     | 0.5854 | 0.7917 | 0.8333 | 0.7500 | 0.7692 | 0.8264 |
|         |          |                   | 13     | 0.5854 | 0.7917 | 0.8333 | 0.7500 | 0.7692 | 0.8403 |
|         |          |                   | 14     | 0.5854 | 0.7917 | 0.8333 | 0.7500 | 0.7692 | 0.8264 |
|         |          |                   | 15     | 0.5854 | 0.7917 | 0.8333 | 0.7500 | 0.7692 | 0.8403 |
|         |          |                   | 16     | 0.6025 | 0.7917 | 0.9167 | 0.6667 | 0.7333 | 0.8611 |
|         |          |                   | 17     | 0.6025 | 0.7917 | 0.9167 | 0.6667 | 0.7333 | 0.8611 |
|         |          |                   | 18     | 0.5854 | 0.7917 | 0.7500 | 0.8333 | 0.8182 | 0.8681 |
|         |          |                   | 19     | 0.5854 | 0.7917 | 0.7500 | 0.8333 | 0.8182 | 0.8750 |
|         |          |                   | 20     | 0.6025 | 0.7917 | 0.9167 | 0.6667 | 0.7333 | 0.8611 |
|         |          |                   | 21     | 0.6667 | 0.8333 | 0.8333 | 0.8333 | 0.8333 | 0.8681 |
|         |          |                   | 22     | 0.6667 | 0.8333 | 0.8333 | 0.8333 | 0.8333 | 0.8681 |
|         |          |                   | 23     | 0.6667 | 0.8333 | 0.8333 | 0.8333 | 0.8333 | 0.8681 |
|         |          |                   | 24     | 0.6667 | 0.8333 | 0.8333 | 0.8333 | 0.8333 | 0.8681 |
|         |          |                   | 25     | 0.6667 | 0.8333 | 0.8333 | 0.8333 | 0.8333 | 0.8681 |
|         |          | <hr/>             |        |        |        |        |        |        |        |
| M10.009 | original | 1                 | 0.9309 | 0.9643 | 0.9286 | 1.0000 | 1.0000 | 0.9337 |        |
|         |          | 2                 | 0.7454 | 0.8571 | 0.7143 | 1.0000 | 1.0000 | 0.8469 |        |
|         |          | 3                 | 0.8571 | 0.9286 | 0.9286 | 0.9286 | 0.9286 | 0.9286 |        |
|         |          | 4                 | 0.9309 | 0.9643 | 0.9286 | 1.0000 | 1.0000 | 0.9337 |        |
|         |          | 5                 | 0.7454 | 0.8571 | 0.7143 | 1.0000 | 1.0000 | 0.7908 |        |
|         | transfer | 1                 | 0.8571 | 0.9286 | 0.9286 | 0.9286 | 0.9286 | 0.9694 |        |

|                              |          |        |        |        |        |        |        |
|------------------------------|----------|--------|--------|--------|--------|--------|--------|
| learning                     | 2        | 0.8571 | 0.9286 | 0.9286 | 0.9286 | 0.9286 | 0.9694 |
|                              | 3        | 0.8571 | 0.9286 | 0.9286 | 0.9286 | 0.9286 | 0.9694 |
|                              | 4        | 0.8571 | 0.9286 | 0.9286 | 0.9286 | 0.9286 | 0.9694 |
|                              | 5        | 0.8571 | 0.9286 | 0.9286 | 0.9286 | 0.9286 | 0.9694 |
|                              | 6        | 0.8571 | 0.9286 | 0.9286 | 0.9286 | 0.9286 | 0.9694 |
|                              | 7        | 0.8571 | 0.9286 | 0.9286 | 0.9286 | 0.9286 | 0.9694 |
|                              | 8        | 0.8571 | 0.9286 | 0.9286 | 0.9286 | 0.9286 | 0.9694 |
|                              | 9        | 0.8571 | 0.9286 | 0.9286 | 0.9286 | 0.9286 | 0.9694 |
|                              | 10       | 0.8571 | 0.9286 | 0.9286 | 0.9286 | 0.9286 | 0.9694 |
|                              | 11       | 0.8571 | 0.9286 | 0.9286 | 0.9286 | 0.9286 | 0.9490 |
|                              | 12       | 0.8571 | 0.9286 | 0.9286 | 0.9286 | 0.9286 | 0.9490 |
|                              | 13       | 0.8571 | 0.9286 | 0.9286 | 0.9286 | 0.9286 | 0.9490 |
|                              | 14       | 0.8571 | 0.9286 | 0.9286 | 0.9286 | 0.9286 | 0.9490 |
|                              | 15       | 0.8571 | 0.9286 | 0.9286 | 0.9286 | 0.9286 | 0.9490 |
|                              | 16       | 0.7877 | 0.8929 | 0.9286 | 0.8571 | 0.8667 | 0.9286 |
|                              | 17       | 0.7877 | 0.8929 | 0.9286 | 0.8571 | 0.8667 | 0.9286 |
|                              | 18       | 0.7877 | 0.8929 | 0.9286 | 0.8571 | 0.8667 | 0.9184 |
|                              | 19       | 0.7877 | 0.8929 | 0.9286 | 0.8571 | 0.8667 | 0.9235 |
|                              | 20       | 0.7877 | 0.8929 | 0.9286 | 0.8571 | 0.8667 | 0.9286 |
|                              | 21       | 0.8571 | 0.9286 | 0.9286 | 0.9286 | 0.9286 | 0.9439 |
|                              | 22       | 0.8571 | 0.9286 | 0.9286 | 0.9286 | 0.9286 | 0.9439 |
|                              | 23       | 0.8571 | 0.9286 | 0.9286 | 0.9286 | 0.9286 | 0.9337 |
|                              | 24       | 0.8571 | 0.9286 | 0.9286 | 0.9286 | 0.9286 | 0.9490 |
|                              | 25       | 0.8571 | 0.9286 | 0.9286 | 0.9286 | 0.9286 | 0.9337 |
|                              | original | 1      | 0.8819 | 0.9375 | 0.8750 | 1.0000 | 1.0000 |
| 2                            |          | 0.7746 | 0.8750 | 0.7500 | 1.0000 | 1.0000 | 0.8906 |
| 3                            |          | 0.8819 | 0.9375 | 0.8750 | 1.0000 | 1.0000 | 0.8906 |
| 4                            |          | 0.8819 | 0.9375 | 0.8750 | 1.0000 | 1.0000 | 0.8906 |
| 5                            |          | 0.8819 | 0.9375 | 0.8750 | 1.0000 | 1.0000 | 0.8906 |
| M10.014<br>transfer learning | 1        | 1.0000 | 1.0000 | 1.0000 | 1.0000 | 1.0000 | 1.0000 |
|                              | 2        | 1.0000 | 1.0000 | 1.0000 | 1.0000 | 1.0000 | 1.0000 |
|                              | 3        | 1.0000 | 1.0000 | 1.0000 | 1.0000 | 1.0000 | 1.0000 |
|                              | 4        | 1.0000 | 1.0000 | 1.0000 | 1.0000 | 1.0000 | 1.0000 |
|                              | 5        | 1.0000 | 1.0000 | 1.0000 | 1.0000 | 1.0000 | 1.0000 |
|                              | 6        | 1.0000 | 1.0000 | 1.0000 | 1.0000 | 1.0000 | 1.0000 |
|                              | 7        | 1.0000 | 1.0000 | 1.0000 | 1.0000 | 1.0000 | 1.0000 |
|                              | 8        | 1.0000 | 1.0000 | 1.0000 | 1.0000 | 1.0000 | 1.0000 |
|                              | 9        | 1.0000 | 1.0000 | 1.0000 | 1.0000 | 1.0000 | 1.0000 |
|                              | 10       | 1.0000 | 1.0000 | 1.0000 | 1.0000 | 1.0000 | 1.0000 |
|                              | 11       | 1.0000 | 1.0000 | 1.0000 | 1.0000 | 1.0000 | 1.0000 |
|                              | 12       | 1.0000 | 1.0000 | 1.0000 | 1.0000 | 1.0000 | 1.0000 |

|    |        |        |        |        |        |        |
|----|--------|--------|--------|--------|--------|--------|
| 13 | 1.0000 | 1.0000 | 1.0000 | 1.0000 | 1.0000 | 1.0000 |
| 14 | 1.0000 | 1.0000 | 1.0000 | 1.0000 | 1.0000 | 1.0000 |
| 15 | 1.0000 | 1.0000 | 1.0000 | 1.0000 | 1.0000 | 1.0000 |
| 16 | 0.8819 | 0.9375 | 1.0000 | 0.8750 | 0.8889 | 0.9375 |
| 17 | 0.8819 | 0.9375 | 1.0000 | 0.8750 | 0.8889 | 0.9375 |
| 18 | 0.8819 | 0.9375 | 1.0000 | 0.8750 | 0.8889 | 0.9375 |
| 19 | 0.8819 | 0.9375 | 1.0000 | 0.8750 | 0.8889 | 0.9375 |
| 20 | 0.8819 | 0.9375 | 1.0000 | 0.8750 | 0.8889 | 0.9375 |
| 21 | 0.8819 | 0.9375 | 0.8750 | 1.0000 | 1.0000 | 0.9844 |
| 22 | 0.8819 | 0.9375 | 1.0000 | 0.8750 | 0.8889 | 0.9844 |
| 23 | 0.8819 | 0.9375 | 1.0000 | 0.8750 | 0.8889 | 0.9844 |
| 24 | 0.8819 | 0.9375 | 1.0000 | 0.8750 | 0.8889 | 0.9844 |
| 25 | 0.8819 | 0.9375 | 0.8750 | 1.0000 | 1.0000 | 0.9844 |

---

**Table S6.** Comparison of the predictive performance for Cascleave, CAT3, CleavPredict, ScreenCap3, SitePrediction, PROSPERous, DeepCleave (original; before transfer learning) and DeepCleave (transfer; after transfer learning) for the prediction of the substrate cleavage sites of 12 proteases from the caspase and MMP families: C14.001 (caspase-1), C14.003 (caspase-3), C14.004 (caspase-7), C14.005 (caspase-6), C14.006 (caspase-2), M10.002 (matrix metallopeptidase-8), M10.003 (matrix metallopeptidase-2), M10.004 (matrix metallopeptidase-9), M10.005 (matrix metallopeptidase-3), M10.008 (matrix metallopeptidase-7), M10.009 (matrix metallopeptidase-12) and M10.014 (membrane-type matrix metallopeptidase-1). The results were evaluated in terms of MCC, ACC (Accuracy), Sensitivity (Sn), Specificity (Sp), Precision and AUC on the test dataset. NA (not applicable) means that a given tool does not make this prediction. Methods with the best results (AUC) for a given protease are shown in bold font.

| Family  | Merops ID | Tools                        | MCC           | ACC           | Sensitivity   | Specificity   | Precision     | AUC           |
|---------|-----------|------------------------------|---------------|---------------|---------------|---------------|---------------|---------------|
| C14.001 |           | Cascleave                    | 0.0311        | 0.5119        | 0.1905        | 0.8333        | 0.5333        | 0.5088        |
|         |           | CAT3                         | 0.3608        | 0.6786        | 0.7500        | 0.6071        | 0.6563        | 0.6875        |
|         |           | CleavPredict                 |               |               |               | NA            |               |               |
|         |           | ScreenCap3                   | 0.4743        | 0.7368        | 0.7105        | 0.7632        | 0.7500        | 0.7479        |
|         |           | SitePrediction               | 0.7175        | 0.8571        | 0.8095        | 0.9048        | 0.8947        | 0.8926        |
|         |           | PROSPERous                   | 0.7526        | 0.8750        | 0.8333        | 0.9167        | 0.9091        | 0.9141        |
|         |           | DeepCleave (original)        | 0.6641        | 0.8315        | 0.7955        | 0.8667        | 0.8537        | 0.8833        |
|         |           | <b>DeepCleave (transfer)</b> | <b>0.8464</b> | <b>0.9205</b> | <b>0.8636</b> | <b>0.9773</b> | <b>0.9744</b> | <b>0.9556</b> |
| C14.003 |           | Cascleave                    | 0.2023        | 0.5920        | 0.3840        | 0.8000        | 0.6575        | 0.5789        |
|         |           | CAT3                         | 0.5466        | 0.7731        | 0.7923        | 0.7538        | 0.7630        | 0.8561        |
|         |           | CleavPredict                 |               |               |               | NA            |               |               |
|         |           | ScreenCap3                   | 0.7492        | 0.8741        | 0.8489        | 0.8993        | 0.8939        | 0.9275        |
|         |           | SitePrediction               | 0.8559        | 0.9275        | 0.9058        | 0.9493        | 0.9470        | 0.9814        |
|         |           | PROSPERous                   | 0.9317        | 0.9656        | 0.9813        | 0.9500        | 0.9515        | 0.9823        |
|         |           | DeepCleave (original)        | 0.9530        | 0.9759        | 1.0000        | 0.9539        | 0.9521        | 0.9912        |
|         |           | <b>DeepCleave (transfer)</b> | <b>0.9713</b> | <b>0.9856</b> | <b>0.9928</b> | <b>0.9784</b> | <b>0.9787</b> | <b>0.9959</b> |
| Caspase | C14.004   | Cascleave                    | 0.2408        | 0.6143        | 0.4571        | 0.7714        | 0.6667        | 0.6049        |
|         |           | CAT3                         | 0.6797        | 0.8378        | 0.8919        | 0.7838        | 0.8049        | 0.8992        |
|         |           | CleavPredict                 |               |               |               | NA            |               |               |
|         |           | ScreenCap3                   | 0.7379        | 0.8684        | 0.8947        | 0.8421        | 0.8500        | 0.9197        |
|         |           | SitePrediction               | 0.9213        | 0.9605        | 0.9737        | 0.9474        | 0.9487        | 0.9626        |
|         |           | PROSPERous                   | 0.8721        | 0.9359        | 0.9487        | 0.9231        | 0.9250        | 0.9671        |
|         |           | DeepCleave (original)        | 0.9252        | 0.9625        | 0.9487        | 0.9756        | 0.9737        | 0.9518        |
|         |           | <b>DeepCleave (transfer)</b> | <b>0.9487</b> | <b>0.9744</b> | <b>0.9744</b> | <b>0.9744</b> | <b>0.9744</b> | <b>0.9763</b> |
| C14.005 |           | Cascleave                    | 0.0710        | 0.5286        | 0.2328        | 0.8244        | 0.5701        | 0.5261        |
|         |           | CAT3                         | 0.3206        | 0.6583        | 0.7374        | 0.5791        | 0.6366        | 0.6906        |
|         |           | CleavPredict                 |               |               |               | NA            |               |               |
|         |           | ScreenCap3                   | 0.5604        | 0.7802        | 0.7785        | 0.7819        | 0.7811        | 0.8541        |
|         |           | SitePrediction               | 0.7577        | 0.8767        | 0.9300        | 0.8233        | 0.8404        | 0.9325        |
|         |           | PROSPERous                   | 0.9701        | 0.9850        | 0.9933        | 0.9767        | 0.9770        | 0.9968        |
|         |           | DeepCleave (original)        | 0.9870        | 0.9935        | 0.9933        | 0.9936        | 0.9933        | 0.9995        |
|         |           | <b>DeepCleave (transfer)</b> | <b>0.9803</b> | <b>0.9901</b> | <b>0.9967</b> | <b>0.9837</b> | <b>0.9836</b> | <b>0.9994</b> |
| C14.006 |           | Cascleave                    | 0.1387        | 0.5519        | 0.2208        | 0.8831        | 0.6538        | 0.5491        |
|         |           | CAT3                         | 0.5280        | 0.7632        | 0.7237        | 0.8026        | 0.7857        | 0.8301        |
|         |           | CleavPredict                 |               |               |               | NA            |               |               |
|         |           | ScreenCap3                   | 0.6667        | 0.8333        | 0.8333        | 0.8333        | 0.8333        | 0.8971        |
|         |           | SitePrediction               |               |               |               | NA            |               |               |
|         |           | PROSPERous                   |               |               |               | NA            |               |               |
|         |           | DeepCleave (original)        | 0.9759        | 0.9878        | 0.9753        | 1.0000        | 1.0000        | 0.9993        |
|         |           | <b>DeepCleave (transfer)</b> | <b>0.9760</b> | <b>0.9880</b> | <b>0.9877</b> | <b>0.9884</b> | <b>0.9877</b> | <b>0.9996</b> |

|     |         |                              |               |               |               |               |               |               |
|-----|---------|------------------------------|---------------|---------------|---------------|---------------|---------------|---------------|
|     |         | Cascleave                    |               |               | NA            |               |               |               |
|     |         | CAT3                         |               |               | NA            |               |               |               |
|     |         | CleavPredict                 | 0.4623        | 0.7273        | 0.6364        | 0.8182        | 0.7778        | 0.7025        |
|     |         | ScreenCap3                   |               |               |               | NA            |               |               |
|     | M10.002 | <b>SitePrediction</b>        | <b>0.7509</b> | <b>0.8750</b> | <b>0.8500</b> | <b>0.9000</b> | <b>0.8947</b> | <b>0.8775</b> |
|     |         | PROSPERous                   | 0.6939        | 0.825         | 1.0000        | 0.6500        | 0.7407        | 0.8625        |
|     |         | DeepCleave (original)        | 0.2277        | 0.6250        | 0.6500        | 0.5833        | 0.7222        | 0.5667        |
|     |         | DeepCleave (transfer)        | 0.5829        | 0.7879        | 0.7500        | 0.8462        | 0.8824        | 0.8731        |
|     |         | Cascleave                    |               |               |               | NA            |               |               |
|     |         | CAT3                         |               |               |               | NA            |               |               |
|     |         | CleavPredict                 | 0.2099        | 0.6032        | 0.5119        | 0.6944        | 0.6262        | 0.6103        |
|     |         | ScreenCap3                   |               |               |               | NA            |               |               |
|     | M10.003 | SitePrediction               | 0.4603        | 0.7133        | 0.9012        | 0.5253        | 0.6550        | 0.7809        |
|     |         | <b>PROSPERous</b>            | <b>0.7471</b> | <b>0.8736</b> | <b>0.8736</b> | <b>0.8736</b> | <b>0.8736</b> | <b>0.9384</b> |
|     |         | DeepCleave (original)        |               |               |               | NA            |               |               |
|     |         | DeepCleave (transfer)        | 0.7799        | 0.8899        | 0.8991        | 0.8814        | 0.8750        | 0.9401        |
|     |         | Cascleave                    |               |               |               | NA            |               |               |
|     |         | CAT3                         |               |               |               | NA            |               |               |
|     |         | CleavPredict                 | 0.2169        | 0.6081        | 0.5676        | 0.6486        | 0.6176        | 0.5720        |
|     |         | ScreenCap3                   |               |               |               | NA            |               |               |
|     | M10.004 | SitePrediction               | 0.6757        | 0.8378        | 0.8378        | 0.8378        | 0.8378        | 0.8543        |
|     |         | PROSPERous                   | 0.6158        | 0.8077        | 0.7885        | 0.8269        | 0.8200        | 0.9059        |
|     |         | DeepCleave (original)        | 0.2835        | 0.5734        | 0.8654        | 0.4066        | 0.4545        | 0.6103        |
|     |         | <b>DeepCleave (transfer)</b> | <b>0.7067</b> | <b>0.8613</b> | <b>0.8269</b> | <b>0.8824</b> | <b>0.8113</b> | <b>0.9100</b> |
|     |         | Cascleave                    |               |               |               | NA            |               |               |
|     |         | CAT3                         |               |               |               | NA            |               |               |
|     |         | CleavPredict                 | 0.4545        | 0.7273        | 0.7273        | 0.7273        | 0.7273        | 0.7107        |
|     |         | ScreenCap3                   |               |               |               | NA            |               |               |
| MMP | M10.005 | SitePrediction               | 0.7175        | 0.8571        | 0.8095        | 0.9047        | 0.8947        | 0.9206        |
|     |         | <b>PROSPERous</b>            | <b>0.7845</b> | <b>0.8810</b> | <b>1.0000</b> | <b>0.7619</b> | <b>0.8077</b> | <b>0.9320</b> |
|     |         | DeepCleave (original)        | 0.3861        | 0.7027        | 0.8095        | 0.5625        | 0.7083        | 0.6250        |
|     |         | DeepCleave (transfer)        | 0.7566        | 0.8780        | 0.9048        | 0.8500        | 0.8636        | 0.9190        |
|     |         | Cascleave                    |               |               |               | NA            |               |               |
|     |         | CAT3                         |               |               |               | NA            |               |               |
|     |         | CleavPredict                 |               |               |               | NA            |               |               |
|     |         | ScreenCap3                   |               |               |               | NA            |               |               |
|     | M10.008 | SitePrediction               | 0.4824        | 0.7375        | 0.6500        | 0.8250        | 0.7879        | 0.7744        |
|     |         | PROSPERous                   | 0.7091        | 0.8523        | 0.9091        | 0.7955        | 0.8163        | 0.9424        |
|     |         | DeepCleave (original)        | 0.2551        | 0.6264        | 0.6591        | 0.5957        | 0.6042        | 0.6533        |
|     |         | <b>DeepCleave (transfer)</b> | <b>0.8636</b> | <b>0.9318</b> | <b>0.9318</b> | <b>0.9318</b> | <b>0.9318</b> | <b>0.9551</b> |
|     |         | Cascleave                    |               |               |               | NA            |               |               |
|     |         | CAT3                         |               |               |               | NA            |               |               |
|     |         | CleavPredict                 |               |               |               | NA            |               |               |
|     |         | ScreenCap3                   |               |               |               | NA            |               |               |
|     | M10.009 | SitePrediction               | 0.3656        | 0.6786        | 0.5714        | 0.7857        | 0.7273        | 0.7436        |
|     |         | PROSPERous                   | 0.6766        | 0.8378        | 0.8108        | 0.8649        | 0.8571        | 0.9218        |
|     |         | DeepCleave (original)        | 0.2629        | 0.6316        | 0.5405        | 0.7179        | 0.6452        | 0.6341        |
|     |         | <b>DeepCleave (transfer)</b> | <b>0.8158</b> | <b>0.9079</b> | <b>0.8919</b> | <b>0.9231</b> | <b>0.9167</b> | <b>0.9550</b> |
|     |         | Cascleave                    |               |               |               | NA            |               |               |
|     |         | CAT3                         |               |               |               | NA            |               |               |
|     |         | CleavPredict                 |               |               |               | NA            |               |               |
|     |         | ScreenCap3                   |               |               |               | NA            |               |               |
|     |         | SitePrediction               |               |               |               | NA            |               |               |
|     | M10.014 | PROSPERous                   | 0.6390        | 0.8125        | 0.7083        | 0.9167        | 0.8947        | 0.8689        |
|     |         | DeepCleave (original)        | 0.2988        | 0.6275        | 0.4444        | 0.8333        | 0.7500        | 0.5448        |
|     |         | <b>DeepCleave (transfer)</b> | <b>0.7044</b> | <b>0.8519</b> | <b>0.8750</b> | <b>0.8333</b> | <b>0.8077</b> | <b>0.8875</b> |



**Table S7.** Comparison of the predictive performance of models trained using the CKSAAP, putative secondary structure (SS), PSSM with conservation scores (PSSM+CS), putative solvent accessibility (SAS), one-hot encoding, and all inputs combined (all features) for the substrate cleavage site prediction of 12 proteases. The results were evaluated in terms of MCC, ACC (Accuracy), Sensitivity (Sn), Specificity (Sp), Precision and AUC on the training dataset. The best results for a given protease are marked in bold.

| Family       | Merops ID      | Encoding       | MCC            | ACC            | Sensitivity    | Specificity    | Precision      | AUC            |
|--------------|----------------|----------------|----------------|----------------|----------------|----------------|----------------|----------------|
| Caspase      | C14.001        | CKSAAP         | 0.8169±        | 0.9000±        | 0.8000±        | <b>1.0000±</b> | <b>1.0000±</b> | <b>1.0000±</b> |
|              |                |                | 0.0346         | 0.0204         | 0.0408         | <b>0.0000</b>  | <b>0.0000</b>  | <b>0.0000</b>  |
|              |                | BLOSUM62       | 0.7746±        | 0.8750±        | 0.7500±        | <b>1.0000±</b> | <b>1.0000±</b> | <b>1.0000±</b> |
|              |                |                | 0.0000         | 0.0000         | 0.0000         | <b>0.0000</b>  | <b>0.0000</b>  | <b>0.0000</b>  |
|              |                | SS             | 0.8508±        | 0.9200±        | 0.8433±        | 0.9967±        | 0.9964±        | 0.9553±        |
|              |                |                | 0.0427         | 0.0233         | 0.0429         | 0.0163         | 0.0178         | 0.0402         |
|              |                | PSSM+CS        | 0.7611±        | 0.8667±        | 0.7333±        | <b>1.0000±</b> | <b>1.0000±</b> | 0.9522±        |
|              | 0.0270         |                | 0.0167         | 0.0333         | <b>0.0000</b>  | <b>0.0000</b>  | 0.0301         |                |
|              | SAS            | 0.7510±        | 0.8650±        | 0.7500±        | 0.9800±        | 0.9760±        | 0.9142±        |                |
|              |                | 0.0421         | 0.0178         | 0.0000         | 0.0356         | 0.0427         | 0.0397         |                |
|              | One-hot        | <b>0.9712±</b> | <b>0.9850±</b> | <b>0.9700±</b> | <b>1.0000±</b> | <b>1.0000±</b> | 0.9906±        |                |
|              |                | <b>0.0385</b>  | <b>0.0200</b>  | <b>0.0400</b>  | <b>0.0000</b>  | <b>0.0000</b>  | 0.0163         |                |
|              | All features   | 0.9625±        | 0.9800±        | 0.9657±        | 0.9943±        | 0.9950±        | <b>1.0000±</b> |                |
|              |                | 0.0602         | 0.0321         | 0.0610         | 0.0280         | 0.0245         | <b>0.0000</b>  |                |
| C14.003      | CKSAAP         | 0.8625±        | 0.9263±        | 0.8526±        | 1.0000±        | 1.0000±        | 0.9669±        |                |
|              |                | 0.0345         | 0.0197         | 0.0394         | 0.0000         | 0.0000         | 0.0123         |                |
|              | BLOSUM62       | 0.9474±        | 0.9737±        | 0.9737±        | 0.9737±        | 0.9737±        | 0.9976±        |                |
|              |                | 0.0000         | 0.0000         | 0.0000         | 0.0000         | 0.0000         | 0.0006         |                |
|              | SS             | 0.0847±        | 0.5405±        | 0.6253±        | 0.4558±        | 0.5380±        | 0.6200±        |                |
|              |                | 0.0881         | 0.0409         | 0.1072         | 0.1256         | 0.0355         | 0.0242         |                |
|              | PSSM+CS        | 0.9094±        | 0.9526±        | 1.0000±        | 0.9053±        | 0.9136±        | 0.9787±        |                |
| 0.0119       |                | 0.0064         | 0.0000         | 0.0129         | 0.0108         | 0.0090         |                |                |
| SAS          | 0.8698±        | 0.9332±        | 0.8926±        | 0.9737±        | 0.9713±        | 0.9700±        |                |                |
|              | 0.0380         | 0.0204         | 0.0407         | 0.0000         | 0.0013         | 0.0020         |                |                |
| One-hot      | <b>0.9740±</b> | <b>0.9868±</b> | <b>1.0000±</b> | <b>0.9737±</b> | <b>0.9744±</b> | <b>0.9978±</b> |                |                |
|              | <b>0.0000</b>  | <b>0.0000</b>  | <b>0.0000</b>  | <b>0.0000</b>  | <b>0.0000</b>  | <b>0.0003</b>  |                |                |
| All features | <b>0.9740±</b> | <b>0.9868±</b> | <b>1.0000±</b> | <b>0.9737±</b> | <b>0.9744±</b> | 0.9992±        |                |                |
|              | <b>0.0000</b>  | <b>0.0000</b>  | <b>0.0000</b>  | <b>0.0000</b>  | <b>0.0000</b>  | 0.0005         |                |                |
| C14.004      | CKSAAP         | 0.9861±        | 0.9927±        | 0.9891±        | 0.9964±        | 0.9967±        | 1.0000±        |                |
|              |                | 0.0319         | 0.0167         | 0.0295         | 0.0178         | 0.0163         | 0.0000         |                |
|              | BLOSUM62       | 1.0000±        | 1.0000±        | 1.0000±        | 1.0000±        | 1.0000±        | 1.0000±        |                |
|              |                | 0.0000         | 0.0000         | 0.0000         | 0.0000         | 0.0000         | 0.0000         |                |
|              | SS             | -0.0328±       | 0.5055±        | 0.7491±        | 0.2618±        | 0.5240±        | 0.4785±        |                |
|              |                | 0.3012         | 0.1222         | 0.1505         | 0.2991         | 0.0998         | 0.1965         |                |
|              | PSSM+CS        | 0.9129±        | 0.9545±        | 1.0000±        | 0.9091±        | 0.9167±        | 1.0000±        |                |
| 0.0000       |                | 0.0000         | 0.0000         | 0.0000         | 0.0000         | 0.0000         |                |                |
| SAS          | <b>1.0000±</b> | <b>1.0000±</b> | <b>1.0000±</b> | <b>1.0000±</b> | <b>1.0000±</b> | <b>1.0000±</b> |                |                |
|              | <b>0.0000</b>  | <b>0.0000</b>  | <b>0.0000</b>  | <b>0.0000</b>  | <b>0.0000</b>  | <b>0.0000</b>  |                |                |
| One-hot      | <b>1.0000±</b> | <b>1.0000±</b> | <b>1.0000±</b> | <b>1.0000±</b> | <b>1.0000±</b> | <b>1.0000±</b> |                |                |
|              | <b>0.0000</b>  | <b>0.0000</b>  | <b>0.0000</b>  | <b>0.0000</b>  | <b>0.0000</b>  | <b>0.0000</b>  |                |                |
| All features | <b>1.0000±</b> | <b>1.0000±</b> | <b>1.0000±</b> | <b>1.0000±</b> | <b>1.0000±</b> | <b>1.0000±</b> |                |                |
|              | <b>0.0000</b>  | <b>0.0000</b>  | <b>0.0000</b>  | <b>0.0000</b>  | <b>0.0000</b>  | <b>0.0000</b>  |                |                |
| C14.005      | CKSAAP         | 0.7963±        | 0.8923±        | 0.9745±        | 0.8100±        | 0.8387±        | 0.9428±        |                |
|              |                | 0.0436         | 0.0252         | 0.0049         | 0.0535         | 0.0383         | 0.0155         |                |

|         |              |                                 |                                 |                                 |                                 |                                 |                                 |
|---------|--------------|---------------------------------|---------------------------------|---------------------------------|---------------------------------|---------------------------------|---------------------------------|
|         | BLOSUM62     | 0.9515±<br>0.0138               | 0.9751±<br>0.0074               | <b>1.0000±</b><br><b>0.0000</b> | 0.9502±<br>0.0148               | 0.9527±<br>0.0129               | 0.9929±<br>0.0025               |
|         | SS           | -0.3814±<br>0.0720              | 0.3564±<br>0.0364               | 0.6836±<br>0.0787               | 0.0291±<br>0.0329               | 0.4121±<br>0.0242               | 0.4124±<br>0.0633               |
|         | PSSM+CS      | 0.9447±<br>0.0000               | 0.9716±<br>0.0000               | 1.0000±<br>0.0000               | 0.9432±<br>0.0000               | 0.9462±<br>0.0000               | 0.9902±<br>0.0020               |
|         | SAS          | 0.9302±<br>0.0189               | 0.9650±<br>0.0096               | 0.9659±<br>0.0000               | 0.9641±<br>0.0192               | 0.9645±<br>0.0180               | 0.9950±<br>0.0014               |
|         | One-hot      | <b>0.9550±</b><br><b>0.0004</b> | <b>0.9773±</b><br><b>0.0000</b> | 0.9909±<br>0.0085               | <b>0.9636±</b><br><b>0.0085</b> | <b>0.9647±</b><br><b>0.0077</b> | 0.9910±<br>0.0028               |
|         | All features | 0.9178±<br>0.0276               | 0.9570±<br>0.0152               | <b>1.0000±</b><br><b>0.0000</b> | 0.9141±<br>0.0303               | 0.9216±<br>0.0249               | <b>0.9977±</b><br><b>0.0009</b> |
|         | CKSAAP       | 0.8462±<br>0.0345               | 0.9170±<br>0.0196               | 0.8340±<br>0.0393               | <b>1.0000±</b><br><b>0.0000</b> | <b>1.0000±</b><br><b>0.0000</b> | 0.9160±<br>0.0136               |
|         | BLOSUM62     | 0.9045±<br>0.0000               | 0.9500±<br>0.0000               | <b>1.0000±</b><br><b>0.0000</b> | 0.9000±<br>0.0000               | 0.9091±<br>0.0000               | 0.9980±<br>0.0040               |
|         | SS           | 0.1109±<br>0.2945               | 0.5680±<br>0.1062               | 0.9000±<br>0.0316               | 0.2360±<br>0.2013               | 0.5484±<br>0.0686               | 0.5359±<br>0.2613               |
| C14.006 | PSSM+CS      | 0.8938±<br>0.0214               | 0.9450±<br>0.0100               | 0.9900±<br>0.0200               | 0.9000±<br>0.0000               | 0.9082±<br>0.0017               | 0.9645±<br>0.0066               |
|         | SAS          | 0.8162±<br>0.0309               | 0.9080±<br>0.0154               | 0.9100±<br>0.0200               | 0.9060±<br>0.0162               | 0.9065±<br>0.0158               | 0.9826±<br>0.0023               |
|         | One-hot      | <b>0.9707±</b><br><b>0.0239</b> | <b>0.9850±</b><br><b>0.0122</b> | <b>1.0000±</b><br><b>0.0000</b> | 0.9700±<br>0.0245               | 0.9714±<br>0.0233               | 0.9985±<br>0.0012               |
|         | All features | 0.8888±<br>0.0362               | 0.9410±<br>0.0198               | <b>1.0000±</b><br><b>0.0000</b> | 0.8820±<br>0.0397               | 0.8956±<br>0.0327               | <b>1.0000±</b><br><b>0.0000</b> |
|         | CKSAAP       | 0.6007±<br>0.3090               | 0.6171±<br>0.1412               | <b>1.0000±</b><br><b>0.0000</b> | 0.2343±<br>0.2825               | 0.5827±<br>0.1024               | <b>1.0000±</b><br><b>0.0000</b> |
|         | BLOSUM62     | 0.8200±<br>0.1119               | 0.9086±<br>0.0554               | 0.9314±<br>0.0714               | 0.8857±<br>0.0571               | 0.8914±<br>0.0548               | 0.9837±<br>0.0082               |
|         | SS           | 0.4038±<br>0.1608               | 0.6457±<br>0.0979               | 0.2914±<br>0.1958               | <b>1.0000±</b><br><b>0.0000</b> | <b>1.0000±</b><br><b>0.0000</b> | <b>1.0000±</b><br><b>0.0000</b> |
| M10.002 | PSSM+CS      | 0.7917±<br>0.4082               | 0.6514±<br>0.2003               | <b>1.0000±</b><br><b>0.0000</b> | 0.3029±<br>0.4007               | 0.6334±<br>0.1897               | 0.8955±<br>0.2098               |
|         | SAS          | 0.8370±<br>0.1270               | 0.9086±<br>0.0743               | 0.8171±<br>0.1486               | <b>1.0000±</b><br><b>0.0000</b> | <b>1.0000±</b><br><b>0.0000</b> | <b>1.0000±</b><br><b>0.0000</b> |
|         | One-hot      | <b>0.9732±</b><br><b>0.0536</b> | <b>0.9857±</b><br><b>0.0286</b> | <b>1.0000±</b><br><b>0.0000</b> | 0.9714±<br>0.0571               | 0.9750±<br>0.0500               | 0.9959±<br>0.0082               |
|         | All features | <b>0.9732±</b><br><b>0.0536</b> | <b>0.9857±</b><br><b>0.0286</b> | 0.9714±<br>0.0571               | 1.0000±<br>0.0000               | 1.0000±<br>0.0000               | <b>1.0000±</b><br><b>0.0000</b> |
| MMP     | CKSAAP       | 0.8163±<br>0.0220               | 0.9058±<br>0.0120               | 0.9486±<br>0.0215               | 0.8630±<br>0.0441               | 0.8759±<br>0.0360               | 0.9639±<br>0.0100               |
|         | BLOSUM62     | 0.7816±<br>0.0178               | 0.8884±<br>0.0095               | 0.9433±<br>0.0060               | 0.8334±<br>0.0187               | 0.8502±<br>0.0145               | 0.9594±<br>0.0058               |
|         | SS           | 0.1816±<br>0.0438               | 0.5888±<br>0.0195               | 0.5830±<br>0.0998               | 0.5946±<br>0.0900               | 0.5930±<br>0.0265               | 0.6057±<br>0.0426               |
| M10.003 | PSSM+CS      | 0.3835±<br>0.1208               | 0.6512±<br>0.0587               | <b>0.9704±</b><br><b>0.0127</b> | 0.3319±<br>0.1153               | 0.5949±<br>0.0389               | 0.7847±<br>0.0532               |
|         | SAS          | 0.5072±<br>0.0661               | 0.7309±<br>0.0362               | 0.5418±<br>0.1120               | 0.9200±<br>0.0714               | 0.8856±<br>0.0714               | 0.8563±<br>0.0301               |
|         | One-hot      | <b>0.8284±</b><br><b>0.0185</b> | <b>0.9140±</b><br><b>0.0093</b> | 0.9081±<br>0.0178               | 0.9200±<br>0.0129               | <b>0.9192±</b><br><b>0.0118</b> | <b>0.9647±</b><br><b>0.0030</b> |
|         | All features | 0.8258±<br>0.0986               | 0.9121±<br>0.0498               | 0.9030±<br>0.0784               | <b>0.9211±</b><br><b>0.0282</b> | 0.9185±<br>0.0307               | 0.9338±<br>0.0478               |



|              |                |                |                |                |                |                |         |
|--------------|----------------|----------------|----------------|----------------|----------------|----------------|---------|
| M10.004      | CKSAAP         | 0.3239±        | 0.6507±        | 0.8076±        | 0.4939±        | 0.6360±        | 0.8161± |
|              |                | 0.2069         | 0.1095         | 0.1174         | 0.2385         | 0.1244         | 0.0746  |
|              | BLOSUM62       | 0.5901±        | 0.7948±        | 0.7739±        | 0.8157±        | 0.8077±        | 0.8219± |
|              |                | 0.0350         | 0.0175         | 0.0174         | 0.0186         | 0.0188         | 0.0124  |
|              | SS             | -0.1604±       | 0.4200±        | 0.4261±        | 0.4139±        | 0.4220±        | 0.4048± |
|              |                | 0.0474         | 0.0236         | 0.0174         | 0.0552         | 0.0192         | 0.0269  |
|              | PSSM+CS        | -0.1906±       | 0.4757±        | 0.9513±        | 0.0000±        | 0.4871±        | 0.6238± |
|              |                | 0.1044         | 0.0270         | 0.0541         | 0.0000         | 0.0147         | 0.1238  |
| SAS          | 0.1173±        | 0.5583±        | 0.5948±        | 0.5217±        | 0.5785±        | 0.5517±        |         |
|              | 0.2821         | 0.1390         | 0.0918         | 0.2324         | 0.1540         | 0.1183         |         |
| One-hot      | <b>0.6003±</b> | <b>0.7991±</b> | <b>0.8191±</b> | 0.7791±        | 0.7892±        | 0.8140±        |         |
|              | <b>0.0468</b>  | <b>0.0232</b>  | <b>0.0402</b>  | 0.0442         | 0.0316         | 0.0212         |         |
| All features | 0.5837±        | 0.7782±        | 0.6448±        | <b>0.9115±</b> | <b>0.8902±</b> | <b>0.8397±</b> |         |
|              | 0.1269         | 0.0612         | 0.0884         | <b>0.0994</b>  | <b>0.1000</b>  | <b>0.0419</b>  |         |
| M10.005      | CKSAAP         | -0.0005±       | 0.5320±        | <b>0.8560±</b> | 0.2080±        | 0.5377±        | 0.7900± |
|              |                | 0.3275         | 0.1303         | <b>0.0496</b>  | 0.2756         | 0.1041         | 0.0613  |
|              | BLOSUM62       | 0.4952±        | 0.7460±        | 0.7000±        | 0.7920±        | 0.7739±        | 0.8384± |
|              |                | 0.0591         | 0.0280         | 0.0000         | 0.0560         | 0.0483         | 0.0415  |
|              | SS             | -0.6432±       | 0.1900±        | 0.2960±        | 0.0840±        | 0.2485±        | 0.1582± |
|              |                | 0.1501         | 0.0693         | 0.0196         | 0.1405         | 0.0423         | 0.1442  |
|              | PSSM+CS        | -0.2336±       | 0.4480±        | 0.8960±        | 0.0000±        | 0.4725±        | 0.7652± |
|              |                | 0.0204         | 0.0098         | 0.0196         | 0.0000         | 0.0057         | 0.0473  |
| SAS          | 0.5775±        | 0.7737±        | 0.6591±        | 0.8884±        | 0.8857±        | 0.7997±        |         |
|              | 0.1661         | 0.0843         | 0.1354         | 0.1367         | 0.1400         | 0.0825         |         |
| One-hot      | <b>0.5931±</b> | <b>0.7840±</b> | 0.6680±        | <b>0.9000±</b> | <b>0.8916±</b> | 0.7720±        |         |
|              | <b>0.1533</b>  | <b>0.0689</b>  | 0.0466         | <b>0.1265</b>  | <b>0.1366</b>  | 0.0720         |         |
| All features | 0.5917±        | 0.7800±        | 0.6840±        | 0.8760±        | 0.8852±        | <b>0.9052±</b> |         |
|              | 0.0789         | 0.0283         | 0.0967         | 0.1450         | 0.1319         | <b>0.0892</b>  |         |
| M10.008      | CKSAAP         | 0.6625±        | 0.8274±        | 0.8011±        | 0.8537±        | 0.8589±        | 0.9057± |
|              |                | 0.0884         | 0.0396         | 0.0327         | 0.1025         | 0.0984         | 0.0656  |
|              | BLOSUM62       | 0.6074±        | 0.8033±        | 0.8000±        | 0.8067±        | 0.8075±        | 0.8803± |
|              |                | 0.0994         | 0.0493         | 0.0408         | 0.0655         | 0.0612         | 0.0115  |
|              | SS             | -0.0131±       | 0.4933±        | 0.5100±        | 0.4767±        | 0.4995±        | 0.5206± |
|              |                | 0.4094         | 0.2037         | 0.1948         | 0.2218         | 0.1999         | 0.2474  |
|              | PSSM+CS        | -0.0450±       | 0.4933±        | 0.8100±        | 0.1767±        | 0.4985±        | 0.6953± |
|              |                | 0.1680         | 0.0631         | 0.0764         | 0.1381         | 0.0420         | 0.0532  |
| SAS          | 0.4585±        | 0.6517±        | 0.3300±        | <b>0.9733±</b> | <b>0.9346±</b> | 0.6075±        |         |
|              | 0.2125         | 0.0897         | 0.1787         | <b>0.0564</b>  | <b>0.3876</b>  | 0.2423         |         |
| One-hot      | <b>0.6637±</b> | <b>0.8300±</b> | <b>0.8533±</b> | 0.8067±        | 0.8190±        | 0.8744±        |         |
|              | <b>0.0686</b>  | <b>0.0352</b>  | <b>0.0488</b>  | 0.0696         | 0.0505         | 0.0314         |         |
| All features | 0.6595±        | 0.8259±        | 0.8004±        | 0.8515±        | 0.8571±        | <b>0.9068±</b> |         |
|              | 0.0898         | 0.0402         | 0.0322         | 0.1037         | 0.0994         | <b>0.0647</b>  |         |
| M10.009      | CKSAAP         | 0.1730±        | 0.5514±        | <b>0.9543±</b> | 0.1486±        | 0.5390±        | 0.9051± |
|              |                | 0.2106         | 0.1021         | <b>0.0343</b>  | 0.2175         | 0.0843         | 0.0316  |
|              | BLOSUM62       | 0.8101±        | 0.9043±        | 0.9114±        | 0.8971±        | 0.9000±        | 0.9663± |
|              |                | 0.0375         | 0.0195         | 0.0366         | 0.0355         | 0.0296         | 0.0241  |
|              | SS             | -0.1679±       | 0.4314±        | 0.4029±        | 0.4600±        | 0.4262±        | 0.4335± |
|              |                | 0.1338         | 0.0588         | 0.2276         | 0.2635         | 0.0599         | 0.2059  |
|              | PSSM+CS        | 0.2712±        | 0.6000±        | 0.8514±        | 0.3486±        | 0.5835±        | 0.8029± |
|              |                | 0.2294         | 0.1125         | 0.0967         | 0.2629         | 0.0955         | 0.0961  |
| SAS          | 0.4015±        | 0.6986±        | 0.6400±        | 0.7571±        | 0.7243±        | 0.7394±        |         |
|              | 0.1518         | 0.0770         | 0.1134         | 0.0808         | 0.0760         | 0.1007         |         |
| One-hot      | <b>0.8433±</b> | <b>0.9214±</b> | 0.9286±        | <b>0.9143±</b> | <b>0.9162±</b> | 0.9508±        |         |
|              | <b>0.0278</b>  | <b>0.0143</b>  | 0.0000         | <b>0.0286</b>  | <b>0.0248</b>  | 0.0172         |         |

|         |              |                                 |                                 |                                 |                                 |                                 |                                 |
|---------|--------------|---------------------------------|---------------------------------|---------------------------------|---------------------------------|---------------------------------|---------------------------------|
|         | All features | 0.7879±<br>0.1074               | 0.8814±<br>0.0652               | 0.9257±<br>0.0795               | 0.8371±<br>0.1835               | 0.8796±<br>0.1286               | <b>0.9657±</b><br><b>0.0238</b> |
|         | CKSAAP       | -0.2807±<br>0.1398              | 0.4525±<br>0.0406               | 0.9050±<br>0.0812               | 0.0000±<br>0.0000               | 0.4741±<br>0.0228               | 0.4719±<br>0.0924               |
|         | BLOSUM62     | 0.8341±<br>0.0591               | 0.9125±<br>0.0306               | 0.9500±<br>0.0612               | 0.8750±<br>0.0791               | 0.8906±<br>0.0639               | <b>0.9875±</b><br><b>0.0063</b> |
|         | SS           | -0.4804±<br>0.0000              | 0.3125±<br>0.0000               | 0.6250±<br>0.0000               | 0.0000±<br>0.0000               | 0.3846±<br>0.0000               | 0.1125±<br>0.0063               |
| M10.014 | PSSM+CS      | NA                              | 0.5000±<br>0.0000               | 1.0000±<br>0.0000               | 0.0000±<br>0.0000               | 0.5000±<br>0.0000               | 0.7375±<br>0.0932               |
|         | SAS          | 0.4621±<br>0.3028               | 0.7025±<br>0.1524               | 0.9200±<br>0.0696               | 0.4850±<br>0.3227               | 0.6797±<br>0.1667               | 0.8856±<br>0.0771               |
|         | One-hot      | <b>0.9528±</b><br><b>0.0578</b> | <b>0.9750±</b><br><b>0.0306</b> | <b>0.9900±</b><br><b>0.0339</b> | <b>0.9600±</b><br><b>0.0583</b> | <b>0.9644±</b><br><b>0.0518</b> | 0.9844±<br>0.0242               |
|         | All features | 0.5809±<br>0.2370               | 0.7750±<br>0.1118               | 0.6800±<br>0.0620               | 0.8700±<br>0.2487               | 0.8995±<br>0.1759               | 0.8725±<br>0.0889               |

**Table S8.** Comparison of the predictive performance of models trained using the CKSAAP, BLOSUM62, putative secondary structure (SS), PSSM with conservation scores (PSSM+CS), putative solvent accessibility (SAS), one-hot encoding, and all inputs combined (all features) for the substrate cleavage site prediction of 12 proteases. The results were evaluated in terms of MCC, ACC (Accuracy), Sensitivity (Sn), Specificity (Sp), Precision and AUC on the independent test dataset. The best results for a given protease are shown in bold font.

| Family       | Merops ID    | Encoding strategy | MCC           | ACC           | Sensitivity   | Specificity   | Precision     | AUC           |
|--------------|--------------|-------------------|---------------|---------------|---------------|---------------|---------------|---------------|
| Caspase      | C14.001      | CKSAAP            | 0.6269        | 0.8068        | 0.7045        | 0.9091        | 0.8857        | 0.8533        |
|              |              | BLOSUM62          | 0.7735        | 0.8864        | 0.8636        | 0.9091        | 0.9048        | 0.9437        |
|              |              | SS                | 0.3453        | 0.6705        | 0.7500        | 0.5909        | 0.6471        | 0.7020        |
|              |              | PSSM+CS           | 0.5965        | 0.7955        | 0.8636        | 0.7273        | 0.7600        | 0.8585        |
|              |              | SAS               | 0.7800        | 0.8864        | 0.8182        | 0.9545        | 0.9474        | 0.9236        |
|              |              | One-hot           | <b>0.8464</b> | <b>0.9205</b> | 0.8636        | <b>0.9773</b> | <b>0.9744</b> | <b>0.9556</b> |
|              |              | All features      | 0.7957        | 0.8977        | <b>0.8864</b> | 0.9091        | 0.9070        | 0.9411        |
|              | C14.003      | CKSAAP            | 0.6088        | 0.7979        | 0.6950        | 0.9007        | 0.8750        | 0.9022        |
|              |              | BLOSUM62          | 0.9583        | 0.9787        | <b>1.0000</b> | 0.9574        | 0.9592        | 0.9932        |
|              |              | SS                | 0.3411        | 0.6702        | 0.7021        | 0.6383        | 0.6600        | 0.7442        |
|              |              | PSSM+CS           | 0.7885        | 0.8936        | 0.9220        | 0.8652        | 0.8725        | 0.9666        |
|              |              | SAS               | 0.8516        | 0.9255        | 0.9433        | 0.9078        | 0.9110        | 0.9787        |
|              |              | One-hot           | <b>0.9713</b> | <b>0.9856</b> | 0.9928        | <b>0.9784</b> | <b>0.9787</b> | <b>0.9959</b> |
|              |              | All features      | 0.9506        | 0.9752        | 0.9858        | 0.9645        | 0.9653        | 0.9953        |
|              | C14.004      | CKSAAP            | 0.7436        | 0.8718        | 0.8718        | 0.8718        | 0.8718        | 0.9145        |
|              |              | BLOSUM62          | 0.8986        | 0.9487        | 0.9744        | 0.9231        | 0.9268        | 0.9717        |
|              |              | SS                | 0.1604        | 0.5769        | 0.7179        | 0.4359        | 0.5600        | 0.5401        |
|              |              | PSSM+CS           | 0.8473        | 0.9231        | 0.9487        | 0.8974        | 0.9024        | 0.9671        |
|              |              | SAS               | 0.8986        | 0.9487        | 0.9231        | <b>0.9744</b> | 0.9730        | 0.9698        |
|              |              | One-hot           | <b>0.9487</b> | <b>0.9744</b> | 0.9744        | <b>0.9744</b> | <b>0.9744</b> | 0.9763        |
|              |              | All features      | 0.9258        | 0.9615        | <b>1.0000</b> | 0.9231        | 0.9286        | <b>0.9869</b> |
|              | C14.005      | CKSAAP            | 0.5465        | 0.7633        | 0.6300        | 0.8967        | 0.8591        | 0.8752        |
|              |              | BLOSUM62          | 0.9576        | 0.9783        | <b>1.0000</b> | 0.9567        | 0.9585        | 0.9987        |
|              |              | SS                | 0.2275        | 0.6117        | 0.7067        | 0.5167        | 0.5938        | 0.6474        |
|              |              | PSSM+CS           | 0.8241        | 0.9117        | 0.9333        | 0.8900        | 0.8946        | 0.9683        |
|              |              | SAS               | 0.9167        | 0.9583        | 0.9533        | 0.9633        | 0.9630        | 0.9887        |
|              |              | One-hot           | <b>0.9803</b> | <b>0.9901</b> | 0.9967        | <b>0.9837</b> | <b>0.9836</b> | <b>0.9994</b> |
| All features |              | 0.9350            | 0.9667        | 0.9967        | 0.9367        | 0.9403        | 0.9930        |               |
| C14.006      | CKSAAP       | 0.7174            | 0.8580        | 0.8272        | 0.8889        | 0.8816        | 0.9079        |               |
|              | BLOSUM62     | 0.9401            | 0.9691        | <b>1.0000</b> | 0.9383        | 0.9419        | 0.9921        |               |
|              | SS           | 0.1656            | 0.5802        | 0.7037        | 0.4568        | 0.5644        | 0.6322        |               |
|              | PSSM+CS      | 0.8906            | 0.9444        | 0.9753        | 0.9136        | 0.9186        | 0.9893        |               |
|              | SAS          | 0.8765            | 0.9383        | 0.9383        | 0.9383        | 0.9383        | 0.9875        |               |
|              | One-hot      | <b>0.9760</b>     | <b>0.9880</b> | 0.9877        | <b>0.9884</b> | <b>0.9877</b> | <b>0.9996</b> |               |
|              | All features | 0.9401            | 0.9691        | <b>1.0000</b> | 0.9383        | 0.9419        | 0.9974        |               |
| M10.002      | CKSAAP       | 0.4201            | 0.6500        | <b>1.0000</b> | 0.3000        | 0.5882        | 0.7475        |               |
|              | BLOSUM62     | 0.5507            | 0.7750        | 0.7500        | 0.8000        | 0.7895        | 0.8300        |               |
|              | SS           | 0.1502            | 0.5750        | 0.6000        | 0.5500        | 0.5714        | 0.6588        |               |
|              | PSSM+CS      | 0.2801            | 0.6000        | 0.9500        | 0.2500        | 0.5588        | 0.6725        |               |
|              | SAS          | 0.4193            | 0.7000        | 0.8500        | 0.5500        | 0.6538        | 0.7400        |               |
|              | One-hot      | <b>0.5829</b>     | <b>0.7879</b> | 0.7500        | <b>0.8462</b> | <b>0.8824</b> | <b>0.8731</b> |               |
|              | All features | 0.4551            | 0.7250        | 0.6500        | 0.8000        | 0.7647        | 0.7875        |               |
| M10.003      | CKSAAP       | 0.1958            | 0.5896        | 0.3888        | 0.7905        | 0.6498        | 0.6376        |               |
|              | BLOSUM62     | 0.7148            | 0.8564        | 0.8942        | 0.8186        | 0.8313        | 0.9353        |               |
|              | SS           | 0.2031            | 0.6015        | 0.5875        | 0.6156        | 0.6044        | 0.6012        |               |
|              | PSSM+CS      | 0.2225            | 0.5940        | 0.8618        | 0.3261        | 0.5612        | 0.6688        |               |

|         |              |               |               |               |               |               |               |
|---------|--------------|---------------|---------------|---------------|---------------|---------------|---------------|
|         | SAS          | 0.3378        | 0.6641        | 0.5464        | 0.7819        | 0.7147        | 0.7302        |
|         | One-hot      | <b>0.7799</b> | <b>0.8899</b> | <b>0.8991</b> | 0.8814        | <b>0.8750</b> | <b>0.9401</b> |
|         | All features | 0.2332        | 0.5680        | 0.1620        | <b>0.9741</b> | 0.8621        | 0.7287        |
| M10.004 | CKSAAP       | 0.2809        | 0.6186        | 0.3505        | 0.8866        | 0.7556        | 0.5980        |
|         | BLOSUM62     | 0.5571        | 0.7778        | 0.8148        | 0.7407        | 0.7586        | 0.8769        |
|         | SS           | 0.0371        | 0.5185        | 0.5000        | 0.5370        | 0.5192        | 0.4642        |
|         | PSSM+CS      | 0.3175        | 0.6574        | 0.7222        | 0.5926        | 0.6393        | 0.6344        |
|         | SAS          | 0.1809        | 0.5833        | 0.3889        | 0.7778        | 0.6364        | 0.6211        |
|         | One-hot      | <b>0.7067</b> | <b>0.8613</b> | <b>0.8269</b> | 0.8824        | 0.8113        | <b>0.9100</b> |
|         | All features | 0.4961        | 0.7222        | 0.5000        | <b>0.9444</b> | <b>0.9000</b> | 0.8059        |
| M10.005 | CKSAAP       | 0.3540        | 0.6750        | 0.6000        | 0.7500        | 0.7059        | 0.7356        |
|         | BLOSUM62     | 0.4811        | 0.7381        | 0.8095        | 0.6667        | 0.7083        | 0.8776        |
|         | SS           | 0.1010        | 0.5476        | 0.7143        | 0.3810        | 0.5357        | 0.4773        |
|         | PSSM+CS      | 0.3162        | 0.6429        | 0.8571        | 0.4286        | 0.6000        | 0.7574        |
|         | SAS          | 0.1925        | 0.5952        | 0.6667        | 0.5238        | 0.5833        | 0.5805        |
|         | One-hot      | <b>0.7566</b> | <b>0.8780</b> | <b>0.9048</b> | 0.8500        | 0.8636        | <b>0.9190</b> |
|         | All features | 0.4851        | 0.6905        | 0.3810        | <b>1.0000</b> | <b>1.0000</b> | 0.7392        |
| M10.008 | CKSAAP       | 0.4457        | 0.6863        | 0.4118        | 0.9608        | 0.9130        | 0.7532        |
|         | BLOSUM62     | 0.7502        | 0.8750        | 0.8864        | 0.8636        | 0.8667        | 0.9303        |
|         | SS           | 0.1820        | 0.5909        | 0.6136        | 0.5682        | 0.5870        | 0.6472        |
|         | PSSM+CS      | 0.3093        | 0.6477        | 0.5000        | 0.7955        | 0.7097        | 0.7314        |
|         | SAS          | 0.1260        | 0.5341        | 0.1136        | 0.9545        | 0.7143        | 0.5842        |
|         | One-hot      | <b>0.8636</b> | <b>0.9318</b> | <b>0.9318</b> | 0.9318        | 0.9318        | <b>0.9551</b> |
|         | All features | 0.3929        | 0.6477        | 0.3182        | <b>0.9773</b> | <b>0.9333</b> | 0.7515        |
| M10.009 | CKSAAP       | 0.4529        | 0.6702        | 0.3404        | <b>1.0000</b> | <b>1.0000</b> | 0.6125        |
|         | BLOSUM62     | 0.6174        | 0.8051        | 0.8814        | 0.7288        | 0.7647        | 0.8564        |
|         | SS           | 0.1772        | 0.5763        | 0.3220        | 0.8305        | 0.6552        | 0.7070        |
|         | PSSM+CS      | 0.4082        | 0.7034        | 0.7458        | 0.6610        | 0.6875        | 0.7297        |
|         | SAS          | 0.3250        | 0.6610        | 0.7288        | 0.5932        | 0.6418        | 0.7032        |
|         | One-hot      | <b>0.8158</b> | <b>0.9079</b> | <b>0.8919</b> | 0.9231        | 0.9167        | <b>0.9550</b> |
|         | All features | 0.4956        | 0.7373        | 0.5932        | 0.8814        | 0.8333        | 0.7738        |
| M10.014 | CKSAAP       | 0.1644        | 0.5806        | 0.4839        | 0.6774        | 0.6000        | 0.6504        |
|         | BLOSUM62     | 0.5833        | 0.7917        | 0.7917        | 0.7917        | 0.7917        | 0.8576        |
|         | SS           | 0.0845        | 0.5417        | 0.6250        | 0.4583        | 0.5357        | 0.4427        |
|         | PSSM+CS      | 0.3146        | 0.6458        | 0.8333        | 0.4583        | 0.6061        | 0.7292        |
|         | SAS          | 0.4226        | 0.7083        | 0.6250        | 0.7917        | 0.7500        | 0.7708        |
|         | One-hot      | <b>0.7044</b> | <b>0.8519</b> | <b>0.8750</b> | 0.8333        | 0.8077        | <b>0.8875</b> |
|         | All features | 0.5130        | 0.7083        | 0.4167        | <b>1.0000</b> | <b>1.0000</b> | 0.8767        |

**Table S9.** Summary of the results of the proteome-wide substrate cleavage site predictions for the 20425 human sequences and 12 proteases from caspase and MMP families generated by DeepCleave. These predictions utilize high-confidence specificity level ( $\geq 0.99$ ) for each protease to generate high-confidence results.

| Family   | Protease                                 | MEROPS ID | Number of sequences | Number of cleavage sites |
|----------|------------------------------------------|-----------|---------------------|--------------------------|
| Caspases | caspase-1                                | C14.001   | 68                  | 286                      |
|          | caspase-3                                | C14.003   | 293                 | 2745                     |
|          | caspase-7                                | C14.004   | 77                  | 4784                     |
|          | caspase-6                                | C14.005   | 717                 | 5518                     |
|          | caspase-2                                | C14.006   | 189                 | 2703                     |
|          | Total                                    |           |                     | 1344                     |
| MMPs     | matrix metalloproteinase-8               | M10.002   | 24                  | 357                      |
|          | matrix metalloproteinase-2               | M10.003   | 577                 | 2518                     |
|          | matrix metalloproteinase-9               | M10.004   | 22                  | 591                      |
|          | matrix metalloproteinase-3               | M10.005   | 49                  | 1294                     |
|          | matrix metalloproteinase-7               | M10.008   | 44                  | 1355                     |
|          | matrix metalloproteinase-12              | M10.009   | 23                  | 829                      |
|          | membrane-type matrix metalloproteinase-1 | M10.014   | 38                  | 845                      |
|          | Total                                    |           |                     | 777                      |

**Table S10.** The top-5 significantly enriched GO terms for each protease. The GO terms are divided into three types: BP (biological process); MF (molecular function); and CC (cellular component).

| Protease               | Type | Term                                                            | P-value  |
|------------------------|------|-----------------------------------------------------------------|----------|
| caspase-1<br>(C14.001) | BP   | mRNA splicing                                                   | 1.41E-09 |
|                        | BP   | positive regulation of neuroinflammatory response               | 3.68E-06 |
|                        | BP   | cellular response to interferon-gamma                           | 5.05E-06 |
|                        | BP   | astrocyte activation                                            | 1.70E-05 |
|                        | BP   | RNA export from nucleus                                         | 5.14E-05 |
|                        | CC   | membrane                                                        | 2.56E-12 |
|                        | CC   | cytosol                                                         | 2.45E-10 |
|                        | CC   | catalytic step 2 spliceosome                                    | 1.64E-07 |
|                        | CC   | nucleus                                                         | 2.06E-07 |
|                        | CC   | focal adhesion                                                  | 3.79E-07 |
|                        | MF   | RNA binding                                                     | 5.53E-18 |
|                        | MF   | protein kinase binding                                          | 1.90E-06 |
|                        | MF   | cadherin binding                                                | 1.14E-05 |
|                        | MF   | identical protein binding                                       | 2.03E-05 |
|                        | MF   | apolipoprotein binding                                          | 6.83E-05 |
| caspase-3<br>(C14.003) | BP   | apoptotic process                                               | 7.19E-20 |
|                        | BP   | viral process                                                   | 2.64E-17 |
|                        | BP   | intrinsic apoptotic signaling pathway in response to DNA damage | 5.78E-14 |
|                        | BP   | protein phosphorylation                                         | 2.82E-13 |
|                        | BP   | neuron apoptotic process                                        | 3.29E-13 |
|                        | CC   | cytosol                                                         | 2.03E-50 |

|                        |    |                                          |          |
|------------------------|----|------------------------------------------|----------|
|                        | CC | cytoplasm                                | 1.73E-29 |
|                        | CC | nucleoplasm                              | 2.26E-29 |
|                        | CC | nucleus                                  | 1.80E-26 |
|                        | CC | protein-containing complex               | 2.34E-22 |
|                        | MF | identical protein binding                | 1.23E-23 |
|                        | MF | RNA binding                              | 5.35E-23 |
|                        | MF | protein kinase binding                   | 2.15E-20 |
|                        | MF | ATP binding                              | 2.28E-19 |
|                        | MF | ubiquitin protein ligase binding         | 4.64E-17 |
| caspase-7<br>(C14.004) | BP | mesenchyme migration                     | 9.31E-10 |
|                        | BP | platelet formation                       | 7.39E-09 |
|                        | BP | ephrin receptor signaling pathway        | 2.62E-08 |
|                        | BP | neuron apoptotic process                 | 3.88E-07 |
|                        | BP | negative regulation of apoptotic process | 2.12E-06 |
|                        | CC | cytosol                                  | 3.70E-17 |
|                        | CC | cytoplasm                                | 3.80E-11 |
|                        | CC | nucleoplasm                              | 2.71E-10 |
|                        | CC | extracellular exosome                    | 1.85E-08 |
|                        | CC | nucleus                                  | 1.79E-07 |
|                        | MF | activating transcription factor binding  | 3.46E-09 |
|                        | MF | ATP binding                              | 1.30E-06 |
|                        | MF | structural constituent of cytoskeleton   | 1.91E-06 |
|                        | MF | identical protein binding                | 3.42E-06 |
|                        | MF | protein domain specific binding          | 3.49E-06 |
| caspase-6<br>(C14.005) | BP | mRNA splicing                            | 4.92E-22 |
|                        | BP | RNA splicing                             | 1.15E-11 |
|                        | BP | viral process                            | 2.46E-10 |
|                        | BP | mRNA processing                          | 1.83E-09 |
|                        | BP | regulation of mRNA stability             | 6.14E-09 |
|                        | CC | nucleoplasm                              | 2.51E-62 |
|                        | CC | cytosol                                  | 1.27E-47 |
|                        | CC | nucleus                                  | 2.66E-39 |
|                        | CC | integral component of membrane           | 1.89E-31 |
|                        | CC | membrane                                 | 1.13E-28 |
|                        | MF | RNA binding                              | 9.94E-68 |
|                        | MF | cadherin binding                         | 4.34E-17 |
|                        | MF | G protein-coupled receptor activity      | 9.61E-13 |
|                        | MF | ATP binding                              | 1.77E-11 |
|                        | MF | mRNA binding                             | 1.02E-08 |
| caspase-2<br>(C14.006) | BP | mRNA splicing                            | 1.34E-15 |
|                        | BP | RNA metabolic process                    | 1.48E-08 |
|                        | BP | viral process                            | 3.48E-06 |

|                    |    |                                       |          |
|--------------------|----|---------------------------------------|----------|
|                    | BP | negative regulation of mRNA splicing  | 3.57E-05 |
|                    | BP | RNA export from nucleus               | 5.47E-05 |
|                    | CC | nucleoplasm                           | 2.18E-18 |
|                    | CC | cytosol                               | 3.99E-18 |
|                    | CC | membrane                              | 1.45E-15 |
|                    | CC | nucleus                               | 2.52E-13 |
|                    | CC | integral component of membrane        | 6.64E-11 |
|                    | MF | RNA binding                           | 8.29E-30 |
|                    | MF | cadherin binding                      | 3.03E-08 |
|                    | MF | proteasome-activating ATPase activity | 1.26E-07 |
|                    | MF | mRNA binding                          | 2.10E-06 |
|                    | MF | RNA strand annealing activity         | 8.81E-06 |
| MMP-8<br>(M10.002) | BP | mRNA splicing                         | 4.92E-22 |
|                    | BP | RNA splicing                          | 1.15E-11 |
|                    | BP | viral process                         | 2.46E-10 |
|                    | BP | mRNA processing                       | 1.83E-09 |
|                    | BP | regulation of mRNA stability          | 6.14E-09 |
|                    | CC | nucleoplasm                           | 2.51E-62 |
|                    | CC | cytosol                               | 1.27E-47 |
|                    | CC | nucleus                               | 2.66E-39 |
|                    | CC | integral component of membrane        | 1.89E-31 |
|                    | CC | membrane                              | 1.13E-28 |
|                    | MF | RNA binding                           | 9.94E-68 |
|                    | MF | cadherin binding                      | 4.34E-17 |
|                    | MF | G protein-coupled receptor activity   | 9.61E-13 |
|                    | MF | ATP binding                           | 1.77E-11 |
|                    | MF | mRNA binding                          | 1.02E-08 |
| MMP-2<br>(M10.003) | BP | mRNA splicing                         | 4.92E-22 |
|                    | BP | RNA splicing                          | 1.15E-11 |
|                    | BP | viral process                         | 2.46E-10 |
|                    | BP | mRNA processing                       | 1.83E-09 |
|                    | BP | regulation of mRNA stability          | 6.14E-09 |
|                    | CC | nucleoplasm                           | 2.51E-62 |
|                    | CC | cytosol                               | 1.27E-47 |
|                    | CC | nucleus                               | 2.66E-39 |
|                    | CC | integral component of membrane        | 1.89E-31 |
|                    | CC | membrane                              | 1.13E-28 |
|                    | MF | RNA binding                           | 9.94E-68 |
|                    | MF | cadherin binding                      | 4.34E-17 |
|                    | MF | G protein-coupled receptor activity   | 9.61E-13 |
|                    | MF | ATP binding                           | 1.77E-11 |
|                    | MF | mRNA binding                          | 1.02E-08 |

|                    |    |                                     |          |
|--------------------|----|-------------------------------------|----------|
| MMP-9<br>(M10.004) | BP | mRNA splicing                       | 4.92E-22 |
|                    | BP | RNA splicing                        | 1.15E-11 |
|                    | BP | viral process                       | 2.46E-10 |
|                    | BP | mRNA processing                     | 1.83E-09 |
|                    | BP | regulation of mRNA stability        | 6.14E-09 |
|                    | CC | nucleoplasm                         | 2.51E-62 |
|                    | CC | cytosol                             | 1.27E-47 |
|                    | CC | nucleus                             | 2.66E-39 |
|                    | CC | integral component of membrane      | 1.89E-31 |
|                    | CC | membrane                            | 1.13E-28 |
|                    | MF | RNA binding                         | 9.94E-68 |
|                    | MF | cadherin binding                    | 4.34E-17 |
|                    | MF | G protein-coupled receptor activity | 9.61E-13 |
|                    | MF | ATP binding                         | 1.77E-11 |
|                    | MF | mRNA binding                        | 1.02E-08 |
| MMP-3<br>(M10.005) | BP | mRNA splicing                       | 4.92E-22 |
|                    | BP | RNA splicing                        | 1.15E-11 |
|                    | BP | viral process                       | 2.46E-10 |
|                    | BP | mRNA processing                     | 1.83E-09 |
|                    | BP | regulation of mRNA stability        | 6.14E-09 |
|                    | CC | nucleoplasm                         | 2.51E-62 |
|                    | CC | cytosol                             | 1.27E-47 |
|                    | CC | nucleus                             | 2.66E-39 |
|                    | CC | integral component of membrane      | 1.89E-31 |
|                    | CC | membrane                            | 1.13E-28 |
|                    | MF | RNA binding                         | 9.94E-68 |
|                    | MF | cadherin binding                    | 4.34E-17 |
|                    | MF | G protein-coupled receptor activity | 9.61E-13 |
|                    | MF | ATP binding                         | 1.77E-11 |
|                    | MF | mRNA binding                        | 1.02E-08 |
| MMP-7<br>(M10.008) | BP | mRNA splicing                       | 4.92E-22 |
|                    | BP | RNA splicing                        | 1.15E-11 |
|                    | BP | viral process                       | 2.46E-10 |
|                    | BP | mRNA processing                     | 1.83E-09 |
|                    | BP | regulation of mRNA stability        | 6.14E-09 |
|                    | CC | nucleoplasm                         | 2.51E-62 |
|                    | CC | cytosol                             | 1.27E-47 |
|                    | CC | nucleus                             | 2.66E-39 |
|                    | CC | integral component of membrane      | 1.89E-31 |
|                    | CC | membrane                            | 1.13E-28 |
|                    | MF | RNA binding                         | 9.94E-68 |
|                    | MF | cadherin binding                    | 4.34E-17 |



|                     |                                       |                                     |               |
|---------------------|---------------------------------------|-------------------------------------|---------------|
|                     | MF                                    | G protein-coupled receptor activity | 9.61E-13      |
|                     | MF                                    | ATP binding                         | 1.77E-11      |
|                     | MF                                    | mRNA binding                        | 1.02E-08      |
| MMP-12<br>(M10.009) | BP                                    | mRNA splicing                       | 4.92E-22      |
|                     | BP                                    | RNA splicing                        | 1.15E-11      |
|                     | BP                                    | viral process                       | 2.46E-10      |
|                     | BP                                    | mRNA processing                     | 1.83E-09      |
|                     | BP                                    | regulation of mRNA stability        | 6.14E-09      |
|                     | CC                                    | nucleoplasm                         | 2.51E-62      |
|                     | CC                                    | cytosol                             | 1.27E-47      |
|                     | CC                                    | nucleus                             | 2.66E-39      |
|                     | CC                                    | integral component of membrane      | 1.89E-31      |
|                     | CC                                    | membrane                            | 1.13E-28      |
|                     | MF                                    | RNA binding                         | 9.94E-68      |
|                     | MF                                    | cadherin binding                    | 4.34E-17      |
|                     | MF                                    | G protein-coupled receptor activity | 9.61E-13      |
|                     | MF                                    | ATP binding                         | 1.77E-11      |
|                     | MF                                    | mRNA binding                        | 1.02E-08      |
|                     | membrane-<br>type-MMP-<br>1 (M10.014) | BP                                  | mRNA splicing |
| BP                  |                                       | RNA splicing                        | 1.15E-11      |
| BP                  |                                       | viral process                       | 2.46E-10      |
| BP                  |                                       | mRNA processing                     | 1.83E-09      |
| BP                  |                                       | regulation of mRNA stability        | 6.14E-09      |
| CC                  |                                       | nucleoplasm                         | 2.51E-62      |
| CC                  |                                       | cytosol                             | 1.27E-47      |
| CC                  |                                       | nucleus                             | 2.66E-39      |
| CC                  |                                       | integral component of membrane      | 1.89E-31      |
| CC                  |                                       | membrane                            | 1.13E-28      |
| MF                  |                                       | RNA binding                         | 9.94E-68      |
| MF                  |                                       | cadherin binding                    | 4.34E-17      |
| MF                  |                                       | G protein-coupled receptor activity | 9.61E-13      |
| MF                  |                                       | ATP binding                         | 1.77E-11      |
| MF                  |                                       | mRNA binding                        | 1.02E-08      |
